# Supplementary material
Source: PubMed Central journal article supplement (PMC10240213)
Supplement: EMBR-24-e56019-s007.pdf [file EMBR-24-e56019-s007.pdf]

# Rapid evolutionary repair by secondary perturbation of a primary disrupted transcriptional network

Po-Chen Hsu, Yu-Hsuan Cheng, Chia-Wei Liao, Richard Ron Litan, Yu-Ting Jhou, Florica Opoc, Ahmed Amine, and Jun-Yi Leu  
DOI: 10.15252/embr.202256019

Corresponding author(s): Po-Chen Hsu ([godshi2006@gmail.com](mailto:godshi2006@gmail.com))

---

## Review Timeline:

|                     |             |
|---------------------|-------------|
| Submission Date:    | 24th Aug 22 |
| Editorial Decision: | 21st Sep 22 |
| Revision Received:  | 20th Dec 22 |
| Editorial Decision: | 3rd Feb 23  |
| Revision Received:  | 22nd Feb 23 |
| Editorial Decision: | 15th Mar 23 |
| Revision Received:  | 16th Mar 23 |
| Accepted:           | 17th Mar 23 |

---

Editor: Ioannis Papaioannou

## Transaction Report:

(Note: With the exception of the correction of typographical or spelling errors that could be a source of ambiguity, letters and reports are not edited. Depending on transfer agreements, referee reports obtained elsewhere may or may not be included in this compilation. Referee reports are anonymous unless the Referee chooses to sign their reports.)

Dear Dr. Hsu,

Thank you for the submission of your research manuscript to EMBO reports and for your patience while it was peer-reviewed. We have now received the full set of referee reports that is copied below.

All referees acknowledge that the study is interesting and largely well-performed, and -as you will see- they all provide broadly favorable reports. However, referees 1 and 3 also point out some concerns that should all be addressed for the improvement of the study, and they provide a number of suggestions that should be considered. In line with their recommendations, interpretation of results should be strongly supported by the presented data and carefully explained, and the rationale for key decisions in the experimental design provided. Furthermore, all referees provide a number of suggestions for minor changes that would further improve the study and the manuscript.

Given these constructive comments, we would like to invite you to revise your manuscript with the understanding that the referee concerns (as detailed above and in their reports) must be fully addressed and their suggestions taken on board. Please address all referee concerns in a complete point-by-point response. Acceptance of the manuscript will depend on a positive outcome of a second round of review. It is EMBO reports policy to allow a single round of revision only and acceptance or rejection of the manuscript will therefore depend on the completeness of your responses included in the next, final version of the manuscript.

We realize that it is difficult to revise to a specific deadline. In the interest of protecting the conceptual advance provided by the work, we recommend a revision within 3 months (December 20th). Please discuss with me the revision progress ahead of this time if you require more time to complete the revisions.

\*\*\*\*\*IMPORTANT NOTE:

We perform an initial quality control of all revised manuscripts before re-review. Your manuscript will FAIL this control and the handling will be DELAYED if the following APPLIES:

- 1) A data availability section providing access to data deposited in public databases is missing. If you have not deposited any data, please add a sentence to the data availability section that explains that.
- 2) Your manuscript contains statistics and error bars based on  $n=2$ . Please use scatter blots in these cases. No statistics should be calculated if  $n=2$ .

When submitting your revised manuscript, please carefully review the instructions that follow below. Failure to include requested items will delay the evaluation of your revision.\*\*\*\*\*

When submitting your revised manuscript, we will require:

- 1) a .docx formatted version of the manuscript text (including legends for main figures, EV figures and tables). Please make sure that the changes are highlighted to be clearly visible.
- 2) individual production quality figure files as .eps, .tif, .jpg (one file per figure). Please download our Figure Preparation Guidelines (figure preparation pdf) from our Author Guidelines pages <https://www.embopress.org/page/journal/14693178/authorguide> for more info on how to prepare your figures.
- 3) a .docx formatted letter INCLUDING the reviewers' reports and your detailed point-by-point responses to their comments. As part of the EMBO Press transparent editorial process, the point-by-point response is part of the Review Process File (RPF), which will be published alongside your paper.
- 4) a complete author checklist, which you can download from our author guidelines (<<https://www.embopress.org/page/journal/14693178/authorguide>>). Please insert information in the checklist that is also reflected in the manuscript. The completed author checklist will also be part of the RPF.
- 5) Please note that all corresponding authors are required to supply an ORCID ID for their name upon submission of a revised manuscript (<<https://orcid.org/>>). Please find instructions on how to link your ORCID ID to your account in our manuscript tracking system in our Author guidelines (<<https://www.embopress.org/page/journal/14693178/authorguide#authorshipguidelines>>)
- 6) We replaced Supplementary Information with Expanded View (EV) Figures and Tables that are collapsible/expandable online. A maximum of 5 EV Figures can be typeset. EV Figures should be cited as "Figure EV1, Figure EV2" etc... in the text and their

respective legends should be included in the main text after the legends of regular figures.

- For the figures that you do NOT wish to display as Expanded View figures, they should be bundled together with their legends in a single PDF file called \*Appendix\*, which should start with a short Table of Content. Appendix figures should be referred to in the main text as: "Appendix Figure S1, Appendix Figure S2" etc. See detailed instructions regarding expanded view here: <<https://www.embopress.org/page/journal/14693178/authorguide#expandedview>>

- Additional Tables/Datasets should be labeled and referred to as Table EV1, Dataset EV1, etc. Legends have to be provided in a separate tab in case of .xls files. Alternatively, the legend can be supplied as a separate text file (README) and zipped together with the Table/Dataset file.

7) Before submitting your revision, primary datasets (and computer code, where appropriate) produced in this study need to be deposited in an appropriate public database (see <<https://www.embopress.org/page/journal/14693178/authorguide#dataavailability>>).

Specifically, we would kindly ask you to provide public access to the following datasets:

- Genome sequencing data
- RNA sequencing data

Please remember to provide a reviewer password if the datasets are not yet public.

The accession numbers and database should be listed in a formal "Data Availability " section (placed after Materials & Method) that follows the model below (see also <<https://www.embopress.org/page/journal/14693178/authorguide#dataavailability>>). Please note that the Data Availability Section is restricted to new primary data that are part of this study.

#### # Data availability

The datasets (and computer code) produced in this study are available in the following databases:

- RNA-Seq data: Gene Expression Omnibus GSE46843 (<https://www.ncbi.nlm.nih.gov/geo/query/acc.cgi?acc=GSE46843>)
- [data type]: [name of the resource] [accession number/identifier/doi] ([URL or identifiers.org/DATABASE:ACCESSION])

\*\*\* Note - All links should resolve to a page where the data can be accessed. \*\*\*

8) We updated our journal's competing interests policy in January 2022 and request authors to consider both actual and perceived competing interests. Please review the new policy (<<https://www.embopress.org/competing-interests>>) and update your competing interests if necessary. Please name this section 'Disclosure and Competing Interests Statement' and place it after the Acknowledgements section.

9) Figure legends and data quantification:

The following points must be specified in each figure legend:

- the name of the statistical test used to generate error bars and P values,
- the number (n) of independent experiments (please specify technical or biological replicates) underlying each data point,
- the nature of the bars and error bars (s.d., s.e.m.)
- If the data are obtained from n {less than or equal to} 2, use scatter blots showing the individual data points.

Discussion of statistical methodology can be reported in the materials and methods section, but figure legends should contain a basic description of n, P and the test applied.

See also the guidelines for figure legend preparation:

<https://www.embopress.org/page/journal/14693178/authorguide#figureformat>

10) We would also encourage you to include the source data for figure panels that show essential data.

Numerical data should be provided as individual .xls or .csv files (including a tab describing the data). For blots or microscopy, uncropped images should be submitted (using a zip archive if multiple images need to be supplied for one panel). Additional information on source data and instruction on how to label the files are available

<<https://www.embopress.org/page/journal/14693178/authorguide#sourcedata>>.

11) Our journal encourages inclusion of \*data citations in the reference list\* to directly cite datasets that were re-used and obtained from public databases. Data citations in the article text are distinct from normal bibliographical citations and should directly link to the database records from which the data can be accessed. In the main text, data citations are formatted as follows: "Data ref: Smith et al, 2001" or "Data ref: NCBI Sequence Read Archive PRJNA342805, 2017". In the Reference list, data citations must be labeled with "[DATASET]". A data reference must provide the database name, accession

number/identifiers and a resolvable link to the landing page from which the data can be accessed at the end of the reference. Further instructions are available at <<https://www.embopress.org/page/journal/14693178/authorguide#referencesformat>>.

12) Please also note our reference format:

<<http://www.embopress.org/page/journal/14693178/authorguide#referencesformat>>.

13) We now use CRediT to specify the contributions of each author in the journal submission system. CRediT replaces the author contribution section. Please use the free text box to provide more detailed descriptions. See also guide to authors: <<https://www.embopress.org/page/journal/14693178/authorguide#authorshipguidelines>>.

14) As part of the EMBO publication's Transparent Editorial Process, EMBO reports publishes online a Review Process File to accompany accepted manuscripts. This File will be published in conjunction with your paper and will include the referee reports, your point-by-point response and all pertinent correspondence relating to the manuscript.

You can opt out of this by letting the editorial office know ([emboreports@embo.org](mailto:emboreports@embo.org)). If you do opt out, the Review Process File link will point to the following statement: "No Review Process File is available with this article, as the authors have chosen not to make the review process public in this case."

We would also welcome the submission of cover suggestions, or motifs to be used by our Graphics Illustrator in designing a cover.

I look forward to seeing a revised form of your manuscript when it is ready. Please let me know if you have questions or comments regarding the revision.

You can use this link to submit your revision: <https://embor.msubmit.net/cgi-bin/main.plex>

Yours sincerely,

Ioannis Papaioannou, PhD  
Editor  
EMBO reports

-----  
Referee #1:

In their manuscript titled "Rapid compensatory evolution by secondary perturbation of a primary disrupted transcriptional network", Hsu et al. have used the *Lachancea* yeast system to investigate how perturbation of organismal fitness due to gene dysregulation can be compensated by the evolution of second site suppressors. Briefly, Hsu et al. exploit the rapid development of genetic suppressors in a  $\Delta$ sef1 strain to understand how perturbation in gene regulatory networks can be rapidly, but conditionally, 'fixed' during evolution. They have previously shown that Sef1 is a transcription factor that has been repurposed in *Lachancea* to regulate the expression of metabolic genes. The authors observe that suppressors of the  $\Delta$ sef1 mutant fall into two main categories, generalists (mediated by *ira1* inactivation) that resolve the growth defects of  $\Delta$ sef1 under fermentative and respiratory conditions and multiple temperatures, and specialists (mediated by *azf1* inactivation) that resolve growth defects of  $\Delta$ sef1 only under respiratory conditions. They further show, using genetic experiments and RNA-seq transcriptomics that the effects of these suppressors can be recapitulated at the level of transcription of TCA cycle genes and heat shock proteins. They finally also show that the frequency of the suppressor in a population can be maintained due to cell non-autonomous effects.

Overall, I find this to be an interesting study, particularly since it tries to address an important question in molecular and systems evolution. This study attempts to bridge the gap between molecular mechanism and organismal phenotype/fitness, which can be challenging even in model organisms like *Saccharomyces* and *E. coli*. The major strength of this study is exploiting a spontaneously arising suppressor using careful genetic and transcriptomics analyses to understand how cells can mutationally rewire their metabolic and gene expression networks. This rewiring is often on a 'need-basis', as seen for the *azf1* mutant and can be conditional. This is an important point which is often missed by researchers working in the area. The weakness of this study, in its present form, lies in firstly not having direct evidence linking loss of a transcription factor (*azf1* for instance) with its specific effects on transcription, which are likely only a subset of those observed at the whole-transcriptomics level. Secondly, the interesting observation that cells can access either a generalist or a specialist suppressor has not been satisfactorily explored. The co-existence, relative abundances and evolutionary pressures driving each of these pathways for gene rewiring remain relatively un-investigated. Thirdly, a few interpretations and data representations are difficult to understand.

Therefore, I would request that the authors address the following queries/concerns before the manuscript can be accepted for

publication:

Major comments:

1. The relative frequencies of occurrence of generalist and specialist suppressors is not apparent from the figures or the text. This information is crucial to understand which of the two suppressor strategies is more common and how that correlates with the trade-off associated with specialist suppression.
2. Have the authors tried directly competing the generalist and specialist suppressors? Are there environments that select one over the other?
3. The growth phenotypes as well as transcriptional profiles of  $\Delta azf1$  and  $\Delta sef1 \Delta azf1$  are extremely similar. This means that in a  $\Delta azf1$  strain the presence or absence of *sef1* is immaterial. Given this fact, I am unclear on why the authors chose to represent *sef1* and *azf1* as two alternative pathways/transcriptional programs (Figure 3J). Would it not make more sense to position *azf1* downstream of *sef1*?
4. Though the authors have used extensive RNA-seq experiments to demonstrate that there is transcriptional rewiring in the suppressors of  $\Delta sef1$ , it is unclear to me where the rewiring exactly is. For example, the authors have previously identified several binding sites for *sef1* in the genome of *Lachancea*. Do these targets also respond to *azf1*, or are the effects of *azf1* through an independent set of gene promoters? Further, since both *sef1* and *azf1* mutations used in this study are gene deletions and loss-of-function mutations, do the authors believe that loss of repression by these factors in driving the observed transcriptomic changes? Finally, how many of the effects that the authors report at the gene expression level are primary rewiring effects, and how many are secondary/tertiary effects? Some clarity on this issue is crucial if the authors want to make the claim that the compensatory effects are due to gene regulatory rewiring. One possible approach to address this could be by performing one-hybrid assays with some of the TCA (and other) gene targets from the RNA-seq.
5. *Azf1* is known to be a prion-like protein in *Saccharomyces*. Given the contribution of heat shock proteins to the phenotypes of *Azf1*, have the authors considered the possibility that some of the phenotypes may be due to loss of the prion form of *azf1* at high temperature in the  $\Delta azf1$  strain rather than its transcriptional roles?
6. The last section of the study that deals with frequency dependent phenotypes and cell non-autonomous effects is interesting, but not sufficiently fleshed out in terms of mechanism. As a result, its relevance in the current manuscript is difficult to understand. Can the authors demonstrate, for example, that the frequency at which the *azf1* mutant occurs in the population of  $\Delta sef1$  strain is higher than expectation? Further, without the molecular mechanisms of these effects that they see I would be wary of just the phenomenological findings. My suggestions would be to remove these observations from the present study and report them once more mechanistic and population-level details are available.

Minor comments:

1. In Figure 1B, the growth rate of the  $\Delta sef1$  seems lower on YPD-PDS than on YPGly. However, plate assays in Figure 1A suggest that growth yield is higher on YPGly than on YPD. Are there trade-offs possibly between yield and growth rate for this mutant?
2. Quantification for Western blots is missing and will significantly improve the reach of the data in this manuscript.
3. Line 80-84. This is an important statement that sets up the question addressed in the paper. However, as it is framed currently, it is very difficult to understand. Perhaps the authors could make this sentence crisper?
4. The authors have presented many as part of the figures associated with this manuscript. However, their legibility and readability are very poor. It may be better to keep them as separate tables rather than as part of figure. This would significantly simplify reading the manuscript.

-----  
Referee #2:

The study with title 'Rapid compensatory evolution by secondary perturbation of a primary disrupted transcriptional network' focuses on the characterization of two targets that emerged from a suppressor screen of a transcriptionally perturbed (*sef1* $\Delta$ ) *L. kluyveri* strain and in depth characterization of one of them. The characterization involved differential expression data of the perturbed and suppressed strains, growth assays in various media, genetic, biochemical and pathway analyses. This is a thorough investigation and a well-written paper.

I only have very minor comments and suggestions.

Fig 3F and 3G: It is unclear to me why the WT in these two panels is different. Are they different constructs or backgrounds? Please clarify or explain the discrepancy.

Throughout the manuscript (for ex. Lines 258-260), *ira1* mutants are treated as generalists. Additionally, the authors used that as an argument to justify focusing the study on the *azf1* mutants. In fact, RAS PKA perturbations are not a generalist strategy, but typically emerge as a response to conditions that involve changes in nutrient abundance. (Had the majority of our evolution experiments in yeast been done in chemostats, RAS PKA would not have been as popular of a target). That is mutations in *azf1* and mutations in *ira1* probably emerged in response to different selective pressures within the same environment. Please re-

visit the document to account for that and consider including a different argument (less explored target?) on why *azf1* mutants were chosen for further analysis. In line 482, it is mentioned that *ira1* generalist impact is specific to the particular set of experiments. That can be introduced earlier on, to avoid confusion.

Is the YPD-YPD in fig S11B some sort of control? It was unclear at first what the media transitions are, because the YPD-YPD is never mentioned in the text or legends or materials and methods. Please add a note explaining in the legend or methods.

The left-most columns in figures S12A and S13 showing DE data are unreadable, unfortunately. The authors can put these data in excel with col-coded wells and turn these panels into summary data, or put the gene columns only in excel with identifiers and use the same identifiers for the figure every a few or several rows.

Please provide a guide for the RNAseq data tables. For example, a brief description of the sheet contexts and the columns at the supplementary tables legends (for example a longer legend in the first table should suffice).

Fig 1B: the two conditions could be combined in a single plot

Given that two adaptive strategies were found, corresponding to perturbations in two genes, it would be interesting to know whether the rest of the isolated clones have mutations in these two genes and whether their phenotypes match the authors' predictions. If in the meantime sequencing information was recovered on these loci for other clones, it would be nice to see them included.

Can data like those in fig 1D be used to approximate suppression rates? And then speculate whether there are other loci that contribute to suppression?

Genetic analysis in fig S5 and S6: Was the phenotyping performed on the parental diploids? It would be nice to have dominance/recessiveness information.

#### Language and typos

The language in the abstract in general could use a little 'tightening' (Line 31: 'minimalize the deleterious effects' to minimize deleterious effects', Lines 33-37: clunky and inefficient writing, Lines 39-42: difficult sentence)

Line 158: 'selecting' - it seems that 'plating' is a more appropriate term

Lines 192 and 195: mention 'three clones' per temperature (l. 192) or mating type (l. 195), but in fact it is three clones per temperature AND mating type, and there are data for 12 clones total. Please re-word.

Lines 204-206: Confusing wording, please re-word for accuracy. Were three clones checked via backcrossing, tetrad dissection and phenotyping of one full tetrad each? This can be gathered by figures S5 and S6, but the writing needs improvement.

Line 755: Fig 16C to Fig S16C

-----  
Referee #3:

The manuscript is an in-depth examination of the causes and pleiotropic consequences of compensatory evolution of a single transcription factor, using various genetic and molecular biology methods. Specifically, the authors deleted *SEF1*, a transcription factor gene involved in respiration from the yeast *L. kluyveri* and then selected for better growing colonies in respiratory medium (glycerol as carbon source). They also initiated selection experiments with added heat stress, as a second selection pressure. The evolved lines were able to compensate their fitness in both sets of experiments, but the compensation was caused by two different mutations: loss-of-function of two transcription factors (*IRA1* and *AZF1*, respectively). As a consequence, the evolved lines behaved differently when exposed to different conditions: only the high-temperature selected lines showed genetic trade-off/antagonistic pleiotropy by growing worse than the wild-type under fermentative conditions (rich glucose medium). Using transcriptomics, the authors showed that the initially deleted and compensatory genes are functionally related through the Ras-cAMP-PKA pathway. Further experiments suggest that *AZF1* deletion can increase fitness via multiple simultaneous mechanisms: by adapting to heat-shock and glycerol, and by restoring the level of TCA cycle genes, downregulated by the *SEF1* deletion, indicating deletion-specific compensation. The authors additionally show that the fitness impact of loss of *AZF1* function is density-dependent, which have relevance to the population genetic mechanisms driving compensatory evolution.

Overall, while the dissection of compensatory mutations is not conceptually novel, to our knowledge, this is the first such detailed work focusing on a transcription factor mutation. Also, demonstrating that a key compensatory mutation shows density-dependent fitness effect represent a conceptual advance. Thus the work is an important step towards understanding how transcription networks may evolve through compensatory evolution. We found most of the presented analyses and methodologies convincing. However, some limitations of the experimental design raised questions about the interpretation of the results, which should be addressed (see below).

Main comments:

1. There are two methodical shortcomings, which might make some of the conclusions less convincing. First, the fitness measurement is mostly based on visual inspection of colony growth, making it difficult to compare the sizes of the changes or to detect epistasis. Importantly, the two compensatory mutations increase/decrease fitness not only in the SEF1 deletion background but also in the wild-type. This raises the question if these fitness effects are larger in the deletion background than in the wild-type background (i.e. genetic interaction/epistasis). More precisely epistasis can only be claimed if the effect of the two mutations together are different to what we would expect based on single mutation effects (e.g. van Leeuwen et al. 2017). Therefore, the conclusion in the following sentence (Line 214) is not followed by its premises: 'Interestingly, the "double-compensation" effect of *ira1Δ* and the "Dex-trade-off and Gly-compensation" effect of *azf1Δ* were retained in the wild-type SEF1 background, and the high-activity *Sef1*-VP16 (Hsu et al., 2021) was unable to mask its effects, indicating that these two genes can function independently of and epistatic to SEF1.' Showing that there is synergistic epistasis would be important because that would answer the question whether the 'compensatory mutations' are really compensating for the harmful mutation, or simply increase fitness because of adaptation to the medium/heat stress.

Even if the authors cannot provide direct evidence, they should discuss this question and present their existing indirect pieces of evidence, suggesting that the mutations might be compensatory: i) *sef1Δ* lines evolved under heat stress are also able to partially compensate fitness when growing in normal temperature (FigS3 D), ii) transcript changes suggest that *azf1* deletion can increase fitness by all three mechanisms: adaptation to the medium, adaptation to heat stress and compensation for the *sef1* deletion.

2. A related shortcoming is the lack of wild-type control in the evolution experiment. Fitness increase can be also expected for the wild-type when grown under the same conditions as the *sef1* deletion mutant (especially under heat stress). Using wild-type controls would show whether the same 'compensatory' mutants appear during their evolution (relating to the first question of their specificity), and how well the compensated *sef1Δ* lines would compete with them. That the wild-type are also expected to evolve and increase its fitness should be at least discussed, since it would affect the potential evolutionary fate of the compensated *sef1Δ* lines.

3. There are some key decisions made by the authors without much explanation given. It would be nice to provide some rationale for the following decisions:

- Why choose *L. kluyveri* and SEF1 deletion?
- What is the rationale behind applying heat stress together with the deletion? What are the authors' expectations?
- What was the motivation to perform the evolutionary experiment using both MAT $\alpha$  and MAT $\alpha$  founder strains? Did the authors expect mating type to influence any outcomes? Was there any difference found?

4. The density-dependent fitness effect of AZF1 deletion is important from a conceptual point of view as it might influence how genetic polymorphism in AZF1 could be maintained in the population. This finding would definitely deserve mentioning in the abstract. Also, the authors may elaborate more on the possibility of compensatory mutations arising first and forming a subpopulation in which subsequent loss-of-function mutations may occur that would otherwise be highly deleterious (i.e. acting as permissive mutations).

Minor comments:

- Prior works reported that compensation of loss-of-function mutations can result in massive transcriptomic rewiring despite fitness restoration, see Szamecz et al. 2014 PLoS Biol and McCloskey et al. 2018 Nat Comm. These works appear to be relevant for the central concept of the manuscript.

- We found the opening sentences of the Abstract confusing: 'The discrete steps of transcriptional rewiring have been proposed to occur neutrally to ensure steady gene expression under stabilizing selection, especially when a regulon is being transferred from one transcription factor (TF) to another. An evolutionarily conflict-free switch of a regulon may require an immediate compensatory evolution to minimize the deleterious effects'. The first sentence seems to suggest an evolutionary scenario of neutral mutations, while the second sentence suggests a different scenario, consisting of a deleterious and a later adaptive (compensatory) step. We guess the authors meant that transcriptional rewiring can result in multiple equally fit outcomes.

- How was 'inconsistent phenotype' defined? In table S3 strains evolved under the same conditions were labelled either inconsistent or consistent even if they had the exact same fitness scores.

- Please indicate sample sizes, when applicable, e.g. in the figure legend of plots with error bars.

- Missing explanation in figure legend of Figure 1 c) about the name "SEF1R". Did the authors mean *sef1Δ::SEF1* ?

- The Figure 3 panel B) C) shows the transcriptional activity of *Sef1* in the different media that are labelled by distinct colors. At panel B) the *Azf1* transcriptional activities are also colored by the media. However, this systematic labelling breaks at the panel F) and G) where the colors already distinguish between negative control (*lexA*) and the *lexA*-Lk*Azf1*. It would be good to have one system for all of the graphs.

At panel E) "*Azf-lexA*" should be corrected to *Azf1-lexA*.

At panel E) it is not clear whether the two bars on the right represent a strain that contains both the plasmid based *lexA*-*Azf1* and the chromosome inserted one or it indicates a strain that carry only the chromosome inserted *Azf1-lexA*.

Most of the panels (except E) and H)) do not indicate whether the experiments were done by the native (chromosome based) promoter or the constative (plasmid based) promoter. However, the authors make the point that they behave differently (panel

E), line 245).

At panel F) and G) the *lexA*-fused TF has a name that includes the species name as well (*lexA-LkAzf1*). What is the purpose of this labelling? One can think that the *Sef1* at panel B) and C) does not derive from *L. kluyveri*, because its name does not include the "Lk".

- Line 340 - The authors say "Indeed, deletion of *AZF1* not only partially restored expression of TCA cycle genes under the YPGly condition (Fig. 5C)". At Figure 5C the expression data are normalized to the *sef1Δ* strain. One could see the restoration better when the data would be normalized to the WT strain.

- At Figure 6 B) and C) labelling of the Y axis should be corrected to HGBR/ HGBS.

- Some of the tables cannot be read because of the too low resolution e.g. Figure S12, S13

- There is a high background of the Figure 1 E lower image (YPGly), therefore it is hard to compare it with the image above (YPD).

#### References:

van Leeuwen, Jolanda, Charles Boone, and Brenda J. Andrews. "Mapping a diversity of genetic interactions in yeast." *Current opinion in systems biology* 6 (2017): 14-21.



1 Response to Reviewer 1 (Reviewer's comments in **bold** and responses in **red**):

2

3 ● **Referee #1:**

4 **Comments to the Authors**

5

6 **In their manuscript titled "Rapid compensatory evolution by secondary**  
7 **perturbation of a primary disrupted transcriptional network", Hsu et al. have**  
8 **used the Lachancea yeast system to investigate how perturbation of**  
9 **organismal fitness due to gene dysregulation can be compensated by the**  
10 **evolution of second site suppressors. Briefly, Hsu et al. exploit the rapid**  
11 **development of genetic suppressors in a  $\Delta$ sef1 strain to understand how**  
12 **perturbation in gene regulatory networks can be rapidly, but conditionally,**  
13 **'fixed' during evolution. They have previously shown that Sef1 is a transcription**  
14 **factor that has been repurposed in Lachancea to regulate the expression of**  
15 **metabolic genes. The authors observe that suppressors of the  $\Delta$ sef1 mutant fall**  
16 **into two main categories, generalists (mediated by ira1 inactivation) that**  
17 **resolve the growth defects of  $\Delta$ sef1 under fermentative and respiratory**  
18 **conditions and multiple temperatures, and specialists (mediated by azf1**  
19 **inactivation) that resolve growth defects of  $\Delta$ sef1 only under respiratory**  
20 **conditions. They further show, using genetic experiments and RNA-seq**  
21 **transcriptomics that the effects of these suppressors can be recapitulated at**  
22 **the level of transcription of TCA cycle genes and heat shock proteins. They**  
23 **finally also show that the frequency of the suppressor in a population can be**  
24 **maintained due to cell non-autonomous effects.**

25

26 **Overall, I find this to be an interesting study, particularly since it tries to address**

27 an important question in molecular and systems evolution. This study attempts  
28 to bridge the gap between molecular mechanism and organismal  
29 phenotype/fitness, which can be challenging even in model organisms like  
30 *Saccharomyces* and *E. coli*. The major strength of this study is exploiting a  
31 spontaneously arising suppressor using careful genetic and transcriptomics  
32 analyses to understand how cells can mutationally rewire their metabolic and  
33 gene expression networks. This rewiring is often on a 'need-basis', as seen for  
34 the *azf1* mutant and can be conditional. This is an important point which is often  
35 missed by researchers working in the area. The weakness of this study, in its  
36 present form, lies in firstly not having direct evidence linking loss of a  
37 transcription factor (*azf1* for instance) with its specific effects on transcription,  
38 which are likely only a subset of those observed at the whole-transcriptomics  
39 level. Secondly, the interesting observation that cells can access either a  
40 generalist or a specialist suppressor has not been satisfactorily explored. The  
41 co-existence, relative abundances and evolutionary pressures driving each of  
42 these pathways for gene rewiring remain relatively un-investigated. Thirdly, a  
43 few interpretations and data representations are difficult to understand.

44

45 Therefore, I would request that the authors address the following  
46 queries/concerns before the manuscript can be accepted for publication:

47

48 **Major comments:**

49 (1) The relative frequencies of occurrence of generalist and specialist  
50 suppressors is not apparent from the figures or the text. This information is  
51 crucial to understand which of the two suppressor strategies is more common  
52 and how that correlates with the trade-off associated with specialist

53 **suppression.**

54 We add the information about the relative frequencies of occurrence of generalist (*ira1*  
55 loss-of-function or related mutations) and specialist (*azf1* loss-of-function and related  
56 mutations) suppressors in the results (lines 216-244) and displayed in Fig EV1 and  
57 EV2. The frequencies were estimated based on direct sequencing and  
58 mutation-specific phenotypic assays (desiccation hypersensitivity for *ira1*  
59 loss-of-function or related mutations; “Dex-trade-off” growth for *azf1* loss-of-function  
60 and related mutations).

61 **(2) Have the authors tried directly competing the generalist and specialist**  
62 **suppressors? Are there environments that select one over the other?**

63 According to the growth (colony size and viability) on the agar plates (Fig 4F), the  
64 generalist (e.g., *ira1Δ*) suppressors were more competitive than the specialist (e.g.,  
65 *azf1Δ*) suppressors in all tested conditions. Interestingly, if under the *sef1Δ*  
66 background (Appendix Fig S9C), the generalist (e.g., *sef1Δira1Δ*) suppressors were  
67 still more competitive than the specialist (e.g., *sef1Δazf1Δ*) suppressors in YPD. In  
68 contrast, the generalist suppressors were more competitive than the specialist  
69 suppressors in YPGly at 28°C but the specialist suppressors became more  
70 competitive under heat stress.

71 Surprisingly, when we competed the *ira1Δ* with the *azf1Δ* strains directly in the  
72 liquid broth for 22 hours (see the Review-only figure below), we found that they  
73 showed similar competitiveness in YPD while the *azf1Δ* strain became more and more  
74 competitive in YPGly from 28 to 37°C. We think one possibility of making this  
75 discrepancy is the different availability of nutrients between agar plates and liquid  
76 broth. However, figuring this out requires more experiments but this is not the key  
77 question that we want to address in this paper. Therefore, we decide not to put this  
78 discussion into the article.

79 <Review-only figure>:

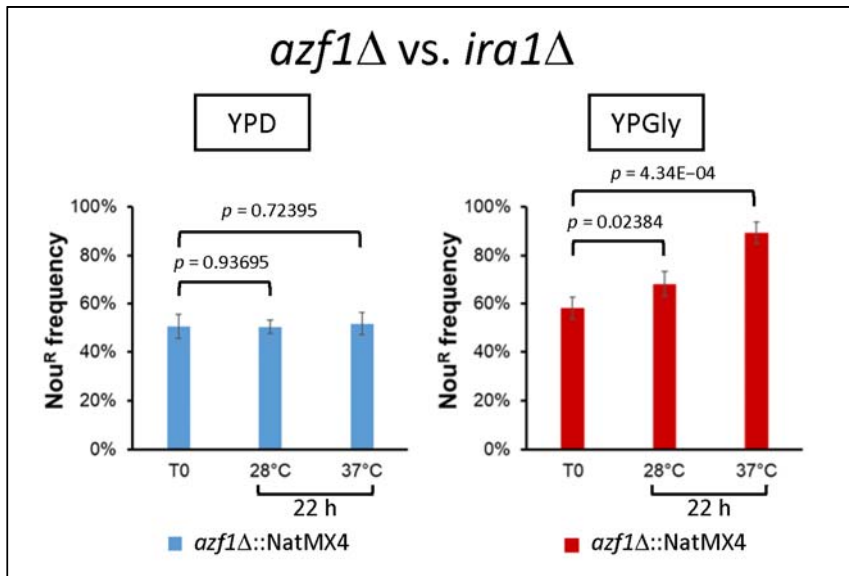

80

81

82 (3) The growth phenotypes as well as transcriptional profiles of  $\Delta azf1$  and  
83  $\Delta sef1\Delta azf1$  are extremely similar. This means that in a  $\Delta azf1$  strain the presence  
84 of absence of *sef1* is immaterial. Given this fact, I am unclear on why the  
85 authors chose to represent *sef1* and *azf1* as two alternative  
86 pathways/transcriptional programs (Figure 3J). Would it not make more sense  
87 to position *azf1* downstream of *sef1*?

88 The *sef1Δ* effect is masked by *azf1Δ* (as shown in the transcriptional profiles). This  
89 result can be explained by two possible mechanisms, one is that *Azf1* is epistatic to  
90 *Sef1* and the other is that *Azf1* and *Sef1* regulate similar target genes but work  
91 independently at the molecular level. We did not choose to put *Azf1* downstream of  
92 *Sef1* is due to the lack of solid regulatory information from *Sef1* to *Azf1* (i.e., the *Sef1*  
93 does not bind to the promoter of *Azf1* (Hsu et al., 2021)). Moreover, the reason why  
94 we represented *Sef1* and *Azf1* as two alternative pathways in Fig 3J is that these two  
95 TFs are both regulated by the upstream *Ras1-Ira1-PKA* signaling pathway and that is  
96 the clear conclusion we got from the experiments in Fig 3.

97 (4) Though the authors have used extensive RNA-seq experiments to  
98 demonstrate that there is transcriptional rewiring in the suppressors of  $\Delta$ sef1, it  
99 is unclear to me where the rewiring exactly is. For example, the authors have  
100 previously identified several binding sites for sef1 in the genome of *Lachancea*.  
101 Do these targets also respond to azf1, or are the effects of azf1 through an  
102 independent set of gene promoters? Further, since both sef1 and azf1  
103 mutations used in this study are gene deletions and loss-of-function mutations,  
104 do the authors believe that loss of repression by these factors is driving the  
105 observed transcriptomic changes? Finally, how many of the effects that the  
106 authors report at the gene expression level are primary rewiring effects, and  
107 how many are secondary/tertiary effects? Some clarity on this issue is crucial if  
108 the authors want to make the claim that the compensatory effects are due to  
109 gene regulatory rewiring. One possible approach to address this could be by  
110 performing one-hybrid assays with some of the TCA (and other) gene targets  
111 from the RNA-seq.

112 First, we would like to clarify the “rewiring” concept discussed in this study. The  
113 consequence of *azf1* loss-of-function is to create a new genetic background that can  
114 stabilize a new transcriptional network without Sef1 (*sef1* $\Delta$ ). This evolutionary change  
115 will potentially stabilize the initial stage of transcriptional rewiring to allow this new  
116 transcriptional network without Sef1 to keep evolving rather than being purged due to  
117 misexpression of important genes (e.g., TCA cycle genes) under selective conditions.  
118 And that is how compensation works to reduce the misexpression of TCA cycle genes.  
119 We did not have any evidence saying that *azf1* $\Delta$  directly triggers the rewiring of Sef1  
120 target genes to another new regulator at the molecular level.

121 Then we conducted a simple experiment to test whether Azf1 affects Sef1 target  
122 genes expression directly or indirectly (Appendix Fig S17) and put it in the Discussion

123 (lines 505-516). Briefly, we deleted the putative Azf1 binding motif on the *IDH2*  
124 promoter (a Sef1 direct target TCA cycle gene) in the wild type and found out this motif  
125 loss did not lead to the upregulation of *IDH2* the same as *azf1* $\Delta$  did. This finding  
126 suggests that *azf1* $\Delta$  upregulates TCA cycle genes indirectly, possibly through other  
127 down-regulated transcriptional regulators in response to *azf1* $\Delta$  (Table EV15),  
128 especially through those potentially transcriptional repressors (Appendix Fig S17D),  
129 which were downregulated in response to *azf1* $\Delta$  and then caused derepression of  
130 many genes such as the TCA cycle genes. Notably, although these transcriptional  
131 regulators are conserved between *L. kluyveri* and *S. cerevisiae*, it is guaranteed that  
132 their target genes are all conserved. Elucidating these mechanisms, especially  
133 figuring out the primary and secondary/tertiary effects resulting from *azf1* $\Delta$  requires  
134 more new experiments and we think it has been beyond the scope of this study.

135 **(5) Azf1 is known to be a prion-like protein in Saccharomyces. Given the**  
136 **contribution of heat shock proteins to the phenotypes of Azf1, have the authors**  
137 **considered the possibility that some of the phenotypes may be due to loss of**  
138 **the prion form of *azf1* at high temperature in the  $\Delta$ *azf1* strain rather than its**  
139 **transcriptional roles?**

140 After carefully reading the papers discussing *S. cerevisiae* Azf1 as a prion-like protein  
141 (Chakrabortee et al., 2016, Cell 167, 369–381; Stewart et al., 2021, PLoS ONE 16(5):  
142 e0247285), we think *L. kluyveri* Azf1 is less likely to regulate the gene expression  
143 indirectly similar to ScAzf1 through its prion toxicity for the following reasons: (1)  
144 unlike ScAzf1 which carries both N-terminal poly-N and poly-Q disordered domains  
145 characterized as the features of a prion-like protein, LkAzf1 does not contain a clear  
146 poly-N domain. Although it still has a poly-Q domain, poly-Q domains are commonly  
147 known to act as a transcriptional activation domain in many TFs; (2) By mating the  
148 *AZF1* cells with the *azf1* cells, the meiotic progenies did not have prion-like

149 inheritance patterns (non-Mendelian fashion)(as shown in our tetrad dissection  
150 assays); (3) the transcriptional responses of *azf1Δ* did not require a higher  
151 temperature. Therefore, the hypothesis that the loss of the prion form of Azf1 at a high  
152 temperature in the *azf1Δ* strain is less likely; (4) usually the prion toxicity induces a  
153 protein homeostasis response (e.g., upregulation of heat-shock proteins). In contrast,  
154 in our study, the deletion of *AZF1* triggered the upregulation of heat-shock proteins  
155 and many other stress-related genes (Appendix Fig S12). Hence, we do not think that  
156 the transcriptional effects of *azf1Δ* come from the loss of Azf1 prion proteins.

157 Also, we think this discussion is beyond the scope of this study. Therefore, we  
158 decided not to put this discussion into the article.

159 **(6) The last section of the study that deals with frequency dependent**  
160 **phenotypes and cell non-autonomous effects is interesting, but not sufficiently**  
161 **fleshed out in terms of mechanism. As a result, its relevance in the current**  
162 **manuscript is difficult to understand. Can the authors demonstrate, for example,**  
163 **that the frequency at which the *azf1* mutant occurs in the population of  $\Delta$ *sef1***  
164 **strain is higher than expectation? Further, without the molecular mechanisms**  
165 **of these effects that they see I would be wary of just the phenomenological**  
166 **findings. My suggestions would be to remove these observations from the**  
167 **present study and report them once more mechanistic and population-level**  
168 **details are available.**

169 We fully understand the concerns of Reviewer 1 about the cell-density-dependent  
170 phenotypes of *azf1* mutants due to the lack of a clear molecular mechanism in this  
171 paper. However, the density-dependent fitness effect of *AZF1* deletion is important  
172 from a conceptual point of view as it might influence how genetic polymorphism in  
173 *AZF1* could be maintained in the population. Moreover, Reviewer 3 is very  
174 appreciative and positive about this part of the experiments and strongly encourages

175 us to put more descriptions about it in the Abstract. Therefore, we contacted the editor,  
176 Dr. Ioannis Papaioannou, to discuss with him this conflict between Reviewer 1 and  
177 Reviewer 3, and got the editorial advice that we should keep the experiment in the  
178 revised manuscript as long as its reproducibility is convincing. We are very confident  
179 about the reproducible results of this experiment and then decide to keep it. Still, we  
180 want to express our sincere appreciation to Reviewer 1 for your prudent attitude  
181 toward this data.

182

183 **Minor comments:**

184 **(1) In Figure 1B, the growth rate of the  $\Delta sef1$  seems lower on YPD-PDS than on**  
185 **YPGly. However, plate assays in Figure 1A suggest that growth yield is higher**  
186 **on YPGly than on YPD. Are there trade-offs possibly between yield and growth**  
187 **rate for this mutant?**

188 We do not think that it is the consequence of a trade-off between yield and growth rate.  
189 We think it is simply that *sef1* $\Delta$  did not favor growing by using ethanol, which is the  
190 major carbon source during the post-diauxic phase growth (YPD-PDS). This is the  
191 reason why we used glycerol as the respiratory carbon source in our study and this  
192 can explain why *sef1* $\Delta$  showed a severer growth defect in the YPD-PDS phase than in  
193 YPGly.

194 **(2) Quantification for Western blots is missing and will significantly improve**  
195 **the reach of the data in this manuscript.**

196 The normalized band intensities are displayed below the blots for Fig 3D, 3I, and  
197 Appendix Fig S7B as ratios of TAP to  $\alpha$ -tubulin signals.

198 **(3) Line 80-84. This is an important statement that sets up the question**  
199 **addressed in the paper. However, as it is frames currently, it is very difficult to**  
200 **understand. Perhaps the authors could make this sentence crisper?**



201 In short, the key point of this section is: “mutations causing larger phenotypic effect  
202 may trigger the evolutionary changes of the current transcriptional network, but  
203 generate trade-offs simultaneously. Therefore, compensatory evolution is  
204 subsequently required to diminish the trade-offs in order to stabilize the newly evolved  
205 transcriptional network”. Moreover, we focused on a situation that “there is no  
206 intermediate stage of transition in which a redundant regulatory machinery evolves  
207 first before the old regulatory connection has broken” by deleting *SEF1* (i.e., the  
208 broken old regulatory connection) directly.

209 We modify this section (lines 80-85) to be “However, such large-effect mutations  
210 may be a double-edged sword due to their deleterious pleiotropic effects (Dittmar *et al*,  
211 2016). Therefore, we aimed to investigate whether and how compensatory evolution  
212 works efficiently to deal with this conflict (trade-offs from new large-effect mutations)  
213 when the “redundancy” mechanism (redundant and/or cooperative machinery of  
214 regulation) is unavailable as new transcriptional networks evolve”.

215 **(4) The authors have presented many as part of the figures associated with**  
216 **this manuscript. However, their legibility and readability are very poor. It may be**  
217 **better to keep them as separate tables rather than as part of figure. This would**  
218 **significantly simplify reading the manuscript.**

219 Although not specified, we believed that the reviewer is talking about the  
220 low-resolution heatmaps. Therefore, we provide high-resolution source tables for all  
221 heatmaps (Fig 4D, 5C, 5D, Appendix Fig S8, S11A, S12A, and S13A) in Table EV17.  
222 Each gene ID, expression level, fold change, and a color gradient of heatmaps are  
223 very clearly provided. However, we still keep the original small heatmap figures  
224 because we aim to visualize the global gene expression patterns across samples (e.g.,  
225 co-upregulation and co-downregulation) to facilitate result interpretations.

226

227

228

229 Response to Reviewer 2 (Reviewer's comments in **bold** and responses in **red**):

230

231 ● **Referee #2:**

232

233 **Comments to the Authors**

234

235 **The study with title 'Rapid compensatory evolution by secondary perturbation**  
236 **of a primary disrupted transcriptional network' focuses on the characterization**  
237 **of two targets that emerged from a suppressor screen of a transcriptionally**  
238 **perturbed (sef1 $\Delta$ ) *L. kluyveri* strain and in depth characterization of one of them.**  
239 **The characterization involved differential expression data of the perturbed and**  
240 **suppressed strains, growth assays in various media, genetic, biochemical and**  
241 **pathway analyses. This is a thorough investigation and a well-written paper.**

242

243 **I only have very minor comments and suggestions.**

244

245 **Minor comments:**

246 **(1) Fig 3F and 3G: It is unclear to me why the WT in these two panels is**  
247 **different. Are they different constructs or backgrounds? Please clarify or**  
248 **explain the discrepancy.**

249 **The WT strains used in Fig 3F and 3G are the same strain. We think the reading**  
250 **difference was just a signal shifting of biochemical reactions between these two**  
251 **experiments. The LacZ assays in Fig 3F and 3G were performed independently.**  
252 **Because the LacZ assay is a biochemical assay in which the enzymatic activity can be**

253 affected by a lot of technical factors, it is not easy to make sure that when handling  
254 different batches of samples, we can always get the same absolute reading values of  
255 biochemical reactions. That is the reason why every time we need to have a WT as a  
256 positive control and all the tested samples are compared with the control. In Fig 3F  
257 and 3G, the conclusions stay unchanged (*ira1*Δ, *RAS1*<sup>G20V</sup>, *pde2*Δ, and *bcy1*Δ  
258 decrease the Azf1 activity under the YPD condition while increasing it under the  
259 YPGly condition) even though the wild-type controls had different values.

260 **(2) Throughout the manuscript (for ex. Lines 258-260), *ira1* mutants are treated**  
261 **as generalists. Additionally, the authors used that as an argument to justify**  
262 **focusing the study on the *azf1* mutants. In fact, RAS PKA perturbations are not**  
263 **a generalist strategy, but typically emerge as a response to conditions that**  
264 **involve changes in nutrient abundance. (Had the majority of our evolution**  
265 **experiments in yeast been done in chemostats, RAS PKA would not have been**  
266 **as popular of a target). That is mutations in *azf1* and mutations in *ira1* probably**  
267 **emerged in response to different selective pressures within the same**  
268 **environment. Please re-visit the document to account for that and consider**  
269 **including a different argument (less explored target?) on why *azf1* mutants were**  
270 **chosen for further analysis. In line 482, it is mentioned that *ira1* generalist**  
271 **impact is specific to the particular set of experiments. That can be introduced**  
272 **earlier on, to avoid confusion.**

273 We completely agree with this comment. We add “However, some arguments suggest  
274 that they typically emerge as a response to conditions that involve changes in nutrient  
275 abundance, such as leading to uncontrolled cell growth in the absence of glucose  
276 (Cazzanelli *et al*, 2018)” in this section (lines 287-290). Moreover, we indeed chose  
277 the *azf1* mutant for further analysis because it is not previously characterized. This  
278 statement has been mentioned in the same paragraph (lines 290-291).

279 **(3) Is the YPD-YPD in fig S11B some sort of control? It was unclear at first what**  
280 **the media transitions are, because the YPD-YPD is never mentioned in the text**  
281 **or legends or materials and methods. Please add a note explaining in the**  
282 **legend or methods.**

283 The YPD→YPD samples were the control without the amino acid pre-starvation. The  
284 method has been described in the Materials and Methods/Phenotypic assays section.  
285 The descriptions for “YPD→YPD” and “SM→YPD” are added to the Appendix Figure  
286 legend.

287 **(4) The left-most columns in figures S12A and S13 showing DE data are**  
288 **unreadable, unfortunately. The authors can put these data in excel with**  
289 **col-coded wells and turn these panels into summary data, or put the gene**  
290 **columns only in excel with identifiers and use the same identifiers for the figure**  
291 **every a few or several rows.**

292 We provide high-resolution source tables for all heatmaps (Fig 4D, 5C, 5D, Appendix  
293 Fig S8, S11A, S12A, and S13A) in Table EV17. Each gene ID, expression level, fold  
294 change, and a color gradient of heatmaps are very clearly provided. However, we still  
295 keep the original small heatmap figures because we aim to visualize the global gene  
296 expression patterns across samples (e.g., co-upregulation and co-downregulation) to  
297 facilitate result interpretations.

298 **(5) Please provide a guide for the RNAseq data tables. For example, a brief**  
299 **description of the sheet contexts and the columns at the supplementary tables**  
300 **legends (for example a longer legend in the first table should suffice).**

301 We add a “README” sheet to each excel file of RNA-seq data tables (Table EV1, EV2,  
302 EV5-EV12) to explain the sheet contexts and the columns.

303 **(6) Fig 1B: the two conditions could be combined in a single plot**

304 Fig 1B is modified as suggested.

305 **(7) Given that two adaptive strategies were found, corresponding to**  
306 **perturbations in two genes, it would be interesting to know whether the rest of**  
307 **the isolated clones have mutations in these two genes and whether their**  
308 **phenotypes match the authors' predictions. If in the meantime sequencing**  
309 **information was recovered on these loci for other clones, it would be nice to see**  
310 **them included.**

311 We add the information about the relative frequencies of occurrence of generalist (*ira1*  
312 loss-of-function or related mutations) and specialist (*azf1* loss-of-function and related  
313 mutations) suppressors in the results (lines 216-244) and displayed in Fig EV1 and  
314 EV2. The frequencies were estimated based on direct sequencing and  
315 mutation-specific phenotypic assays (desiccation hypersensitivity for *ira1*  
316 loss-of-function or related mutations; “Dex-trade-off” growth for *azf1* loss-of-function  
317 and related mutations). Notably, we identified some clones without *azf1* or *ira1*  
318 mutations but they still showed evolved phenotypes (Fig EV1B and 2B), suggesting  
319 that there are other causal mutations possibly playing similar roles in the same  
320 pathways as Azf1 and Ira1 do, respectively.

321 **(8) Can data like those in fig 1D be used to approximate suppression rates?**  
322 **And then speculate whether there are other loci that contribute to suppression?**

323 We estimate the suppression rates by using fluctuation assays (Appendix Fig S18)  
324 and briefly discussed them in the Discussion (lines 521-523). As mentioned above, we  
325 indeed identified some clones without *azf1* or *ira1* mutations but they still showed  
326 evolved phenotypes (Fig EV1B and 2B). Therefore, there must be some other loci that  
327 contribute to suppression but use the same or similar mechanisms.

328 **(9) Genetic analysis in fig S5 and S6: Was the phenotyping performed on the**  
329 **parental diploids? It would be nice to have dominance/ recessiveness**

330 information.

331 Due to all the mutations being loss-of-function or hypomorphic, they are recessive in  
332 the diploids as shown in the figure below. We just add a simple description of the  
333 recessiveness of these mutations in the legends of Appendix Fig S5 and S6.

334 <Review-only figure>:

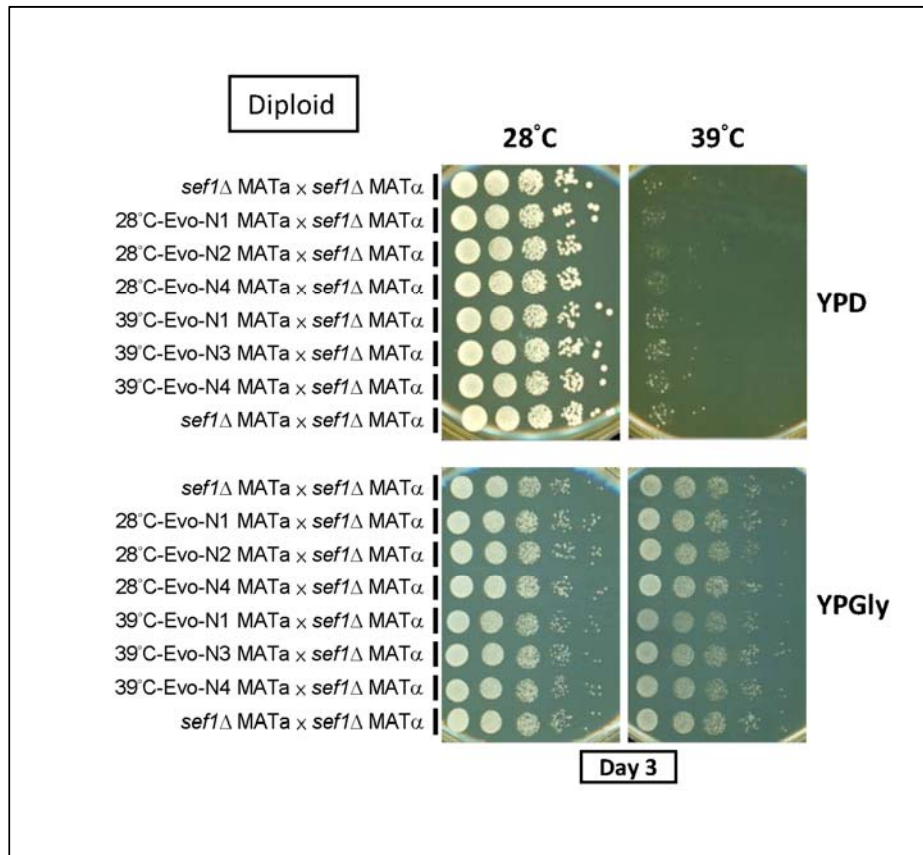

335

336 (10) Language and typos

337 The language in the abstract in general could use a little 'tightening'

338 Line 31: 'minimalize the deleterious effects' to minimize deleterious effects'

339 The sentence is modified as suggested.

340 Lines 33-37: clanky and inefficient writing, Lines 39-42: difficult sentence

341 The sentence is rephrased to: "Our results not only indicate that secondary  
342 transcriptional perturbation provides rapid and adaptive mechanisms potentially

343 stabilizing the initial stage of transcriptional rewiring, but also suggest how genetic  
344 polymorphisms of pleiotropic mutations could be maintained in the population” (lines  
345 39-42).

346 **Line 158: 'selecting' - it seems that 'plating' is a more appropriate term**

347 The sentence is modified as suggested.

348 **Lines 192 and 195: mention 'three clones' per temperature (l. 192) or mating**  
349 **type (l. 195), but in fact it is three clones per temperature AND mating type, and**  
350 **there are data for 12 clones total. Please re-word.**

351 The sentence is changed to: “Therefore, only three clones each of 28°C-Evo MAT $\alpha$ ,  
352 28°C-Evo MAT $\alpha$ , 39°C-Evo MAT $\alpha$ , and 39°C-Evo MAT $\alpha$  lines were re-stocked” (lines  
353 193-194).

354 **Lines 204-206: Confusing wording, please re-word for accuracy.**

355 The whole section (lines 201-206) is reworded to: “Subsequent examination of  
356 mutation types revealed that 28°C-Evo lines carry deletion, missense, or  
357 loss-of-function (premature stop codon-gained) mutations in the *IRA1* loci (Fig 2C)  
358 and 39°C-Evo lines carry missense and another type of loss-of-function mutations  
359 (frameshift) in the *AZF1* loci (Fig 2D), supporting that *ira1* and *azf1* loss-of-function  
360 alleles are the causal mutations in the 28°C-Evo and 39°C-Evo suppressors,  
361 respectively.

362 **Were three clones checked via backcrossing, tetrad dissection and**  
363 **phenotyping of one full tetrad each? This can be gathered by figures S5 and S6,**  
364 **but the writing needs improvement.**

365 Yes, only one representative tetrad of each mating pair was dissected and shown. The  
366 whole section (lines 207-213) is reworded to: “To prove that the suppressive  
367 phenotypes are monogenic, we performed tetrad dissection analyses by backcrossing  
368 the MAT $\alpha$  suppressor clones with their MAT $\alpha$  founders. We checked three each of the

369 MATa 28°C-Evo and MATa 39°C-Evo clones. After sporulation, one tetrad of each  
370 mating pair was dissected. All four spores of each tetrad were phenotyped and the  
371 candidate causal mutation loci were sequenced. All tetrads showed a perfect 2-to-2  
372 ratio between suppressive vs wild-type phenotypes, consistent with the 2-to-2  
373 genotypes (Appendix Fig S5 and S6), indicating a clear monogenic effect of the  
374 suppressive mutation”.

375 **Line 755: Fig 16C to Fig S16C**

376 This typo is changed to “Appendix Fig S16C” (line 900).

377

378

379

380

381

382

383

384

385

386

387

388

389

390

391

392

393

394



395

396

397

398

399 Response to Reviewer 3 (Reviewer's comments in **bold** and responses in **red**):

400

401 ● **Referee #3:**

402

403 **Comments to the Authors**

404

405 **The manuscript is an in-depth examination of the causes and pleiotropic**  
406 **consequences of compensatory evolution of a single transcription factor, using**  
407 **various genetic and molecular biology methods. Specifically, the authors**  
408 **deleted SEF1, a transcription factor gene involved in respiration from the yeast**  
409 **L. kluyveri and then selected for better growing colonies in respiratory medium**  
410 **(glycerol as carbon source). They also initiated selection experiments with**  
411 **added heat stress, as a second selection pressure. The evolved lines were able**  
412 **to compensate their fitness in both sets of experiments, but the compensation**  
413 **was caused by two different mutations: loss-of-function of two transcription**  
414 **factors (IRA1 and AZF1, respectively). As a consequence, the evolved lines**  
415 **behaved differently when exposed to different conditions: only the**  
416 **high-temperature selected lines showed genetic trade-off/antagonistic**  
417 **pleiotropy by growing worse than the wild-type under fermentative conditions**  
418 **(rich glucose medium). Using transcriptomics, the authors showed that the**  
419 **initially deleted and compensatory genes are functionally related through the**  
420 **Ras-cAMP-PKA pathway. Further experiments suggest that AZF1 deletion can**

421 increase fitness via multiple simultaneous mechanisms: by adapting to  
422 heat-shock and glycerol, and by restoring the level of TCA cycle genes  
423 downregulated by the SEF1 deletion, indicating deletion-specific compensation.  
424 The authors additionally show that the fitness impact of loss of AZF1 function is  
425 density-dependent, which have relevance to the population genetic  
426 mechanisms driving compensatory evolution.

427

428 Overall, while the dissection of compensatory mutations is not conceptually  
429 novel, to our knowledge, this is the first such detailed work focusing on a  
430 transcription factor mutation. Also, demonstrating that a key compensatory  
431 mutation shows density-dependent fitness effect represent a conceptual  
432 advance. Thus the work is an important step towards understanding how  
433 transcription networks may evolve through compensatory evolution. We found  
434 most of the presented analyses and methodologies convincing. However, some  
435 limitations of the experimental design raised questions about the interpretation  
436 of the results, which should be addressed (see below).

437

438 **Major comments:**

439

440 (1) There are two methodical shortcomings, which might make some of the  
441 conclusions less convincing. First, the fitness measurement is mostly based on  
442 visual inspection of colony growth, making it difficult to compare the sizes of  
443 the changes or to detect epistasis. Importantly, the two compensatory  
444 mutations increase/decrease fitness not only in the SEF1 deletion background  
445 but also in the wild-type. This raises the question if these fitness effects are  
446 larger in the deletion background than in the wild-type background (i.e. genetic

447 interaction/epistasis). More precisely epistasis can only be claimed if the effect  
448 of the two mutations together are different to what we would expect based on  
449 single mutation effects (e.g. References: van Leeuwen, Jolanda, Charles Boone,  
450 and Brenda J. Andrews. "Mapping a diversity of genetic interactions in yeast."  
451 *Current opinion in systems biology* 6 (2017): 14-21). Therefore, the conclusion  
452 in the following sentence (Line 214) is not followed by its premises:  
453 'Interestingly, the "double-compensation" effect of *ira1* $\Delta$  and the "Dex-trade-off  
454 and Gly-compensation" effect of *azf1* $\Delta$  were retained in the wild-type *SEF1*  
455 background, and the high-activity *Sef1*-VP16 (Hsu et al., 2021) was unable to  
456 mask its effects, indicating that these two genes can function independently of  
457 and epistatic to *SEF1*.' Showing that there is synergistic epistasis would be  
458 important because that would answer the question whether the 'compensatory  
459 mutations' are really compensating for the harmful mutation, or simply increase  
460 fitness because of adaptation to the medium/heat stress. Even if the authors  
461 cannot provide direct evidence, they should discuss this question and present  
462 their existing indirect pieces of evidence, suggesting that the mutations might  
463 be compensatory: i) *sef1* $\Delta$  lines evolved under heat stress are also able to  
464 partially compensate fitness when growing in normal temperature (FigS3 D), ii)  
465 transcript changes suggest that *azf1* deletion can increase fitness by all three  
466 mechanisms: adaptation to the medium, adaptation to heat stress and  
467 compensation for the *sef1* deletion.

468 To avoid confusion, we first completely removed the statement "Interestingly, the  
469 "double-compensation" effect of *ira1* $\Delta$  and the "Dex-trade-off and Gly-compensation"  
470 effect of *azf1* $\Delta$  were retained in the wild-type *SEF1* background, and the high-activity  
471 *Sef1*-VP16 (Hsu et al., 2021) was unable to mask its effects, indicating that these two  
472 genes can function independently of and epistatic to *SEF1*."

473 Then, we performed an epistasis analysis using the maximal growth rates and the  
474 multiplicative model according to the reference (Leeuwen et al., Curr Opin Syst Biol.  
475 2017, 6:14-21) (Table EV13). We add a new section (lines 518-544) in the Discussion  
476 to elaborate on the results of this analysis. Briefly, the *ira1*Δ and *azf1*Δ surprisingly did  
477 not provide better fitness improvement (positive epistasis) in the *sef1*Δ than in the  
478 wild-type backgrounds, indicating that the effects of suppressive mutations do not  
479 dependent on the genetic background (at least in our study).

480 **(2) A related shortcoming is the lack of wild-type control in the evolution**  
481 **experiment. Fitness increase can be also expected for the wild-type when**  
482 **grown under the same conditions as the *sef1* deletion mutant (especially under**  
483 **heat stress). Using wild-type controls would show whether the same**  
484 **'compensatory' mutants appear during their evolution (relating to the first**  
485 **question of their specificity), and how well the compensated *sef1*Δ lines would**  
486 **compete with them. That the wild-type are also expected to evolve and increase**  
487 **its fitness should be at least discussed, since it would affect the potential**  
488 **evolutionary fate of the compensated *sef1*Δ lines.**

489 We performed a new batch of suppressor development experiments including the  
490 wild-type strain and then analyzed the evolved clones from the wild-type population.  
491 We add a new section (lines 518-544) in the Discussion to elaborate on the results.  
492 Interestingly, although at different frequencies, the wild-type population could also  
493 develop evolved clones with similar *azf1* or *ira1* loss-of-function-like phenotypes. Our  
494 findings raise an alternative hypothesis that the *ira1* and *azf1* mutants can form  
495 subpopulations in the wild-type population first and then alleviate the deleterious  
496 effects of the following spontaneous *sef1* mutations (Fig EV 4). This strategy may  
497 allow the *sef1* mutations to be fixed in the population as long as the *sef1* mutants are  
498 not less competitive in future environments.

499 **There are some key decisions made by the authors without much explanation**  
500 **given. It would be nice to provide some rationale for the following decisions:**

501 **- Why choose *L. kluyveri* and SEF1 deletion?**

502 We add the statement “The *L. kluyveri* *Sef1* was chosen due to its known  
503 condition-dependent phenotypes, completely characterized direct target genes,  
504 simple condition-responsive regulation, and proper evolutionary divergence from the  
505 model baker’s yeast (Hsu *et al.*, 2021). All these advantages will help to simplify  
506 subsequent investigation after the evolutionary repair experiments” into the  
507 Introduction (lines 98-102).

508 **- What is the rationale behind applying heat stress together with the deletion?**

509 **What are the authors' expectations?**

510 We did not have a specific rationale or hypothesis behind the strategy of applying heat  
511 stress. That is why we did not mention it in the article.

512 According to our previous work (Hsu *et al.*, 2021), the *L. kluyveri* *sef1Δ* mutant is  
513 more sensitive to heat stress (37–39°C) than the wild type. We just intuitively tried to  
514 trigger the compensatory evolution of *sef1Δ* under two different conditions (with and  
515 without heat stress) and expected to get different suppressive mutations in response  
516 to different conditions. However, we indeed expected that beneficial mutations gained  
517 in one condition might cause trade-offs in the other conditions (it is a well-accepted  
518 knowledge), but this was not the original purpose for applying heat stress before we  
519 got trade-off phenotypes.

520 **- What was the motivation to perform the evolutionary experiment using both**  
521 **MATa and MATalpha founder strains? Did the authors expect mating type to**  
522 **influence any outcomes? Was there any difference found?**

523 We do not expect mating types to affect any outcomes. On the contrary, we expected  
524 two mating types will generate similar evolutionary outcomes (and this is truly what we

525 observed). We took MAT $\alpha$  and MAT $\alpha$  lines as two biological repeats of the  
526 evolution repair experiments. Moreover, we got suppressor clones from two  
527 mating-type lines so that the subsequent genetic analysis for the incompatibility  
528 between suppressive mutations (e.g., Appendix Fig S10) is feasible and easy to be  
529 done.

530 **(3) The density-dependent fitness effect of AZF1 deletion is important from a**  
531 **conceptual point of view as it might influence how genetic polymorphism in**  
532 **AZF1 could be maintained in the population. This finding would definitely**  
533 **deserve mentioning in the abstract.**

534 A brief description (lines 38-39) of the cell density-dependent fitness effect of *azf1*  
535 mutations is added to the Abstract due to the length limitation (175 words).

536 Also, the authors may elaborate more on the possibility of compensatory  
537 mutations arising first and forming a subpopulation in which subsequent  
538 loss-of-function mutations may occur that would otherwise be highly  
539 deleterious (i.e. acting as permissive mutations).

540 We add a new section (lines 518-544) in the Discussion to elaborate on this possibility  
541 according to the new control suppressor development experiment including the  
542 wild-type strain. We also put a new figure to explain this hypothetical model (Fig EV4).

543

544 **Minor comments:**

545

546 **(1) Prior works reported that compensation of loss-of-function mutations can**  
547 **result in massive transcriptomic rewiring despite fitness restoration, see**  
548 **Szamecz et al. 2014 PloS Biol and McCloskey et al. 2018 Nat Comm. These**  
549 **works appear to be relevant for the central concept of the manuscript.**

550 Thanks for the suggestion of citing these two good references. We incorporate them

551 into the Discussion (lines 502-505).

552 **(2) We found the opening sentences of the Abstract confusing: 'The discrete**  
553 **steps of transcriptional rewiring have been proposed to occur neutrally to**  
554 **ensure steady gene expression under stabilizing selection, especially when a**  
555 **regulon is being transferred from one transcription factor (TF) to another. An**  
556 **evolutionarily conflict-free switch of a regulon may require an immediate**  
557 **compensatory evolution to minimize the deleterious effects'. The first**  
558 **sentence seems to suggest an evolutionary scenario of neutral mutations, while**  
559 **the second sentence suggests a different scenario, consisting of a deleterious**  
560 **and a later adaptive (compensatory) step. We guess the authors meant that**  
561 **transcriptional rewiring can result in multiple equally fit outcomes.**

562 The first sentence means the mutational changes in the transcriptional network are  
563 not always necessary to be beneficial at the time when they appear and the  
564 destabilizing mutations on gene expression are usually negatively selected in order to  
565 maintain the optimal gene expression level. The second sentence indicates that the  
566 scenario to keep the destabilizing mutations that alter the topology of the current  
567 transcriptional network is to let compensatory mutation fix the deleterious effect of the  
568 destabilizing mutations. Within a long-enough evolutionary period, the whole changing  
569 process looks neutral and the consequent transcriptional networks with different  
570 topologies may produce equal fitness under some conditions but different phenotypic  
571 plasticity under changing environments.

572 **(3) How was 'inconsistent phenotype' defined? In table S3 strains evolved**  
573 **under the same conditions were labelled either inconsistent or consistent even**  
574 **if they had the exact same fitness scores.**

575 Thanks for helping us to find out the mistakes. We carefully examined the whole table  
576 again and reassigned the “inconsistency” information, based on the criterion that “any

577 clone with a simple fitness score higher than the mean score of the same group +1 or  
578 lower than the mean score of the same group -1 is defined as an inconsistent clone.  
579 Table EV3, Appendix Fig S3F, and the S3F legend are updated.

580 **(4) Please indicate sample sizes, when applicable, e.g. in the figure legend of**  
581 **plots with error bars.**

582 The sample sizes of plots with error bars in all figures are indicated in their figure  
583 legends, including Fig 1B, 3B, 3C, 3E-3H, 6A, 6B, 6F, Appendix Fig S7A, S9A, S9B,  
584 S12B, S16D, S16E, S17C.

585 **(5) Missing explanation in figure legend of Figure 1 c) about the name "SEF1R".**

586 **Did the authors mean *sef1Δ::SEF1* ?**

587 "*SEF1R*" indicates the reconstituted strain *sef1Δ::SEF1*. The description is added to  
588 the figure legend.

589 **(6) The Figure 3 panel B) C) shows the transcriptional activity of Sef1 in the**  
590 **different media that are labelled by distinct colors. At panel B) the Azf1**  
591 **transcriptional activities are also colored by the media. However, this**  
592 **systematic labelling breaks at the panel F) and G) where the colors already**  
593 **distinguish between negative control (*lexA*) and the *lexA-LkAzf1*. It would be**  
594 **good to have one system for all of the graphs.**

595 Fig 3E, 3F, and 3G are modified to be displayed by a consistent labeling system (YPD  
596 in blue and YPGly in red) the same as what is used in Fig 3B and 3C.

597 **At panel E) "*Azf-lexA*" should be corrected to *Azf1-lexA*.**

598 The mislabeling is corrected.

599 **At panel E) it is not clear whether the two bars on the right represent a strain**  
600 **that contains both the plasmid based *lexA-Azf1* and the chromosome inserted**  
601 **one or it indicates a strain that carry only the chromosome inserted *Azf1-lexA*.**

602 The right-most strain carries two copies of *AZF1* (one on the plasmid and the other on



603 the chromosome). Because *Azf1* is a weak activator, we used a strain with two copies  
604 of *AZF1* to confirm the detection of its transcriptional activation activity. The  
605 description is added in the figure legend and clearer figure labeling is made.

606 **Most of the panels (except E) and H)) do not indicate whether the experiments**  
607 **were done by the native (chromosome based) promoter or the constative**  
608 **(plasmid based) promoter. However, the authors make the point that they**  
609 **behave differently (panel E), line 245).**

610 For Fig 3B, 3C, and 3E-3H, either the chromosome-based or the plasmid-based  
611 system is labeled directly in the figures.

612 **At panel F) and G) the *lexA*-fused TF has a name that includes the species name**  
613 **as well (*lexA-LkAzf1*). What is the purpose of this labelling? One can think that**  
614 **the *Sef1* at panel B) and C) does not derive from *L. kluyveri*, because its name**  
615 **does not include the "Lk".**

616 All *Azf1* genes come from *L. kluyveri*. To avoid confusion, "Lk" labeling is all removed.

617 (7) Line 340 - The authors say "Indeed, deletion of *AZF1* not only partially  
618 restored expression of TCA cycle genes under the YPGly condition (Fig. 5C)".

619 **At Figure 5C the expression data are normalized to the *sef1Δ* strain. One could**  
620 **see the restoration better when the data would be normalized to the WT strain.**

621 For Fig 5C, we still prefer to display it by normalization to the *sef1Δ* strain. Because  
622 the expression of TCA cycle genes is only partially restored (not all TCA cycle genes  
623 are restored or restored to the wild-type level), it is not easy to distinguish the  
624 difference of some TCA cycle genes between *sef1Δ* and *sef1Δazf1Δ* strains when  
625 normalized to the WT. However, we provide the alternative heatmap by normalization  
626 to the WT in Table EV17.

627 <Review-only figure>: normalized to *sef1Δ*

| Systemic name | Gene | WD | AzD | SD | SAzD | WG | AzG | SG | SAzG |
|---------------|------|----|-----|----|------|----|-----|----|------|
| SAKL0H24046g  | ACO1 |    |     |    |      |    |     |    |      |
| SAKL0C04180g  | ACO2 |    |     |    |      |    |     |    |      |
| SAKL0E07876g  | IDH1 |    |     |    |      |    |     |    |      |
| SAKL0G03520g  | IDH2 |    |     |    |      |    |     |    |      |
| SAKL0H02860g  | IDP1 |    |     |    |      |    |     |    |      |
| SAKL0D08426g  | IDP3 |    |     |    |      |    |     |    |      |
| SAKL0E08866g  | KGD1 |    |     |    |      |    |     |    |      |
| SAKL0H15422g  | KGD2 |    |     |    |      |    |     |    |      |
| SAKL0B01958g  | LPD1 |    |     |    |      |    |     |    |      |
| SAKL0G03630g  | LSC1 |    |     |    |      |    |     |    |      |
| SAKL0H02464g  | LSC2 |    |     |    |      |    |     |    |      |
| SAKL0G11440g  | SDH1 |    |     |    |      |    |     |    |      |
| SAKL0H25850g  | SDH2 |    |     |    |      |    |     |    |      |
| SAKL0E04136g  | SDH3 |    |     |    |      |    |     |    |      |
| SAKL0H14146g  | SDH4 |    |     |    |      |    |     |    |      |
| SAKL0E00946g  | FUM1 |    |     |    |      |    |     |    |      |
| SAKL0G19140g  | MDH1 |    |     |    |      |    |     |    |      |
| SAKL0C12760g  | MDH2 |    |     |    |      |    |     |    |      |
| SAKL0E04928g  | MDH3 |    |     |    |      |    |     |    |      |
| SAKL0D09152g  | CIT1 |    |     |    |      |    |     |    |      |
| SAKL0B02926g  | CIT3 |    |     |    |      |    |     |    |      |

628

629 <Review-only figure>: normalized to WT

| Systemic name | Gene | WD | AzD | SD | SAzD | WG | AzG | SG | SAzG |
|---------------|------|----|-----|----|------|----|-----|----|------|
| SAKL0H24046g  | ACO1 |    |     |    |      |    |     |    |      |
| SAKL0C04180g  | ACO2 |    |     |    |      |    |     |    |      |
| SAKL0E07876g  | IDH1 |    |     |    |      |    |     |    |      |
| SAKL0G03520g  | IDH2 |    |     |    |      |    |     |    |      |
| SAKL0H02860g  | IDP1 |    |     |    |      |    |     |    |      |
| SAKL0D08426g  | IDP3 |    |     |    |      |    |     |    |      |
| SAKL0E08866g  | KGD1 |    |     |    |      |    |     |    |      |
| SAKL0H15422g  | KGD2 |    |     |    |      |    |     |    |      |
| SAKL0B01958g  | LPD1 |    |     |    |      |    |     |    |      |
| SAKL0G03630g  | LSC1 |    |     |    |      |    |     |    |      |
| SAKL0H02464g  | LSC2 |    |     |    |      |    |     |    |      |
| SAKL0G11440g  | SDH1 |    |     |    |      |    |     |    |      |
| SAKL0H25850g  | SDH2 |    |     |    |      |    |     |    |      |
| SAKL0E04136g  | SDH3 |    |     |    |      |    |     |    |      |
| SAKL0H14146g  | SDH4 |    |     |    |      |    |     |    |      |
| SAKL0E00946g  | FUM1 |    |     |    |      |    |     |    |      |
| SAKL0G19140g  | MDH1 |    |     |    |      |    |     |    |      |
| SAKL0C12760g  | MDH2 |    |     |    |      |    |     |    |      |
| SAKL0E04928g  | MDH3 |    |     |    |      |    |     |    |      |
| SAKL0D09152g  | CIT1 |    |     |    |      |    |     |    |      |
| SAKL0B02926g  | CIT3 |    |     |    |      |    |     |    |      |

630

631 **(8) At Figure 6 B) and C) labelling of the Y axis should be corrected to HGBR/**  
 632 **HGBS.**

633 The original labeling of the Y-axis is correct. We used HGB<sup>R</sup> and HGB<sup>S</sup> (R and S are  
 634 given in superscript) to represent “HGB-resistant” and “HGB-sensitive”, respectively.  
 635 The description is added to the figure legend.

636 **(9) Some of the tables cannot be read because of the too low resolution e.g.**  
 637 **Figure S12, S13**

638 We provide high-resolution source tables for all heatmaps (Fig 4D, 5C, 5D, Appendix  
 639 Fig S8, S11A, S12A, and S13A) in Table EV17. Each gene ID, expression level, fold  
 640 change, and a color gradient of heatmaps are very clearly provided. However, we still  
 641 keep the original small heatmap figures because we aim to visualize the global gene  
 642 expression patterns across samples (e.g., co-upregulation and co-downregulation) to  
 643 facilitate result interpretations.

644 **(10) There is a high background of the Figure 1 E lower image (YPGly), therefore**  
645 **it is hard to compare it with the image above (YPD).**  
646 **The new Fig 1E lower image (YPGly) is modified by a 20% decrease in brightness to**  
647 **decrease the background.**

Dear Dr. Hsu,

Thank you for the submission of your revised manuscript to EMBO reports and for your patience during peer review. We have now received the full set of reports from the three referees that agreed to re-evaluate your study. Please find their comments appended below.

As you will see, all referees find that the manuscript has been substantially improved, new data have been added, and most of the previous concerns have been satisfactorily addressed. However, referee #2 identified an erroneous statement that should be removed, because it is not supported by the presented data. Furthermore, referee #3 points out that the recovered mutations are general beneficial mutations that should not be described as suppressor or compensatory mutations. Therefore, several statements and claims throughout the paper (including the title, the abstract, the Discussion, and the conceptual model presented in Fig. EV4) should be revised to accurately reflect the nature of the mutations. Please make sure that all changes are highlighted (or "tracked") to be clearly visible in the revised manuscript file.

From the editorial side, there are also a few things that we need from you:

- The revised title should be short (up to 100 characters including spaces), informative, and accurate, and it should not contain any abbreviations.
- The abstract should be a single paragraph describing all key novel findings of the study, written in present tense, and it should not exceed 175 words. Please revise it accordingly.
- Please provide up to 5 keywords in your revised manuscript (you currently have 7).
- The author contributions statement should be removed from the manuscript file. Instead, we now use CRediT to specify the contributions of each author in the journal submission system. Please use the free text box to provide more detailed descriptions. See also guide to authors:  
<<https://www.embopress.org/page/journal/14693178/authorguide#authorshipguidelines>>.
- According to our journal's policy, "data not shown" (stated on page 18 of your manuscript) is not permitted. All data referred to in the paper should be displayed in the main or Expanded View figures, or in the Appendix. Please add these data or change the text accordingly if these data are not central to the study and its conclusions.
- Figure callouts for Fig. EV4 and Appendix Figs. S5, S6, S10, and S18 are missing. Please make sure that all panels are called out in your revised manuscript.
- All EV Tables should be renamed as Dataset EV# and uploaded individually using the file type Data Set. Please note that the legends should be added to the corresponding files, and callouts should be revised accordingly.
- Please revise the title and remove line numbering from your Appendix file.
- Your Figure legends have been inspected by our data editors for completeness and accuracy. Please see the required changes in the attached Word file and address all comments in your revised manuscript (with tracked changes).
- Please note that EMBO press papers are accompanied online by
  - A) a short (1-2 sentences) summary of the findings and their significance,
  - B) 2-4 bullet points highlighting the key results, and
  - C) a synopsis image that is exactly 550 pixels wide and 200-600 pixels high (the height is variable). You can either show a model or key data in the synopsis image. Please note that text needs to be readable at the final size.Please send us this information along with your revised manuscript.

Please also note that as part of the EMBO publications' Transparent Editorial Process, EMBO reports publishes online a Review Process File to accompany accepted manuscripts. This File will be published in conjunction with your paper and will include the referee reports, your point-by-point response and all pertinent correspondence relating to the manuscript.

You can opt out of this by letting the editorial office know ([emboreports@embo.org](mailto:emboreports@embo.org)). If you do opt out, the Review Process File link will point to the following statement: "No Review Process File is available with this article, as the authors have chosen not to make the review process public in this case."

We would also welcome the submission of cover suggestions or motifs to be used by our Graphics Illustrator in designing a

cover.

We look forward to seeing a revised version of your manuscript as soon as possible. Please use this link to submit your revision:  
<https://embor.msubmit.net/cgi-bin/main.plex>

Yours sincerely,

Ioannis Papaioannou, PhD  
Editor  
EMBO reports

-----  
Referee #1:

In the revised version of the manuscript, the authors have addressed all my queries satisfactorily. I think that this is an interesting study, and the revised manuscript can be accepted for publication.

-----  
Referee #2:

The manuscript was adequately revised and my concerns for the most part addressed. There was only one point that I insist to be modified in the manuscript prior to publication.

My point on what triggers RAS-PKA mutations was either missed or my comment was not clear enough. In particular, the statement 'All such mutations, which arose repeatedly, proved beneficial, globally enhancing fitness seemly irrespective of the diverse laboratory conditions' in lines 286-287 is erroneous, can be misleading, does not add to the manuscript and thus should be omitted. A careful dissection of the conditions that favor these mutations (all citations that proceed the statement) will show that they arise as a response to nutrient limitation (either in a chemostat or at some point of the cycle in batch culture). In fact, the cited Wenger et al 2011 explicitly showed that the related evolved mutants display tradeoffs when glucose limitation is removed. The manuscript's own desiccation hypersensitivity assay also shows that *ira1* perturbations increase desiccation sensitivity. Additionally, if they indeed globally enhance fitness, then we would have to assume that the activity of the RAS-PKA is suboptimal in the wild parental strain, which does not really make sense. Please omit statement.

-----  
Referee #3:

The authors made a significant effort to improve the manuscript, and I greatly appreciate the new experiments performed, i.e. the epistasis analysis and the evolution experiments using the WT as a control. I also appreciate the honesty with which the new data are presented. However, the new data raises a serious concern about the interpretation of the original suppressor screen.

Specifically, the epistasis analysis (Table EV13) clearly show that the slow-growing *sef1* knockout is not compensated by either *azf1* or *ira1* deletion under the conditions where the suppressor screen was performed (YPGly). It is true that the fitness of *sef1* is enhanced by *azf1* or *ira1* deletion, however, wild-type fitness is also enhanced to a similar extent by these mutations. Thus, there is no evidence for compensation / suppression, which would manifest itself as positive epistasis between *sef1* and *azf1* or *ira1* (i.e. that's the widely used definition of suppression / compensation, see van Leeuwen et al. Science 2016, Moore, Rozen, Lenski Proc Roy Soc B 2000). In a similar vein, the authors now report the possible emergence of *azf1* and *ira1* mutations when the wild-type background was subjected to 'suppressor' screening. Together these observations indicate that the recovered mutations are general beneficial mutations in these environments and not suppressor or compensatory mutations. Simply, I don't see any evidence for compensatory evolution. This is more than a terminological nuance. It implies that several of the claims of the paper (including title and abstract) has to be rewritten to reflect the fact that the suppressor screen identified mutations that are general beneficial mutations and can be selected in the WT background as well. It further implies that the conceptual model presented on Fig EV4 should also be heavily revised: *ira1* or *azf1* deletions do not actually act as permissive mutations because they don't change the relative fitness impact of SEF1 loss.

Overall, I still think that the study is highly worthy of publication in EMBO Reports as it uncovers an important molecular rewiring

by which fitness can be increased. However, the conceptual framework and story must be substantially changed to accommodate the totality of evidence presented by the authors.

Response to Editor (Editorial comments in **bold** and responses in **red**):

- **Editorial side:**

**Comments to the Authors**

**The revised title should be short (up to 100 characters including spaces), informative, and accurate, and it should not contain any abbreviations.**

We revise our title to “Rapid evolutionary repair by secondary perturbation of a primary disrupted transcriptional network” (98 characters including spaces). Specifically, we use “evolutionary repair” to replace “compensatory evolution” in the old title.

**The abstract should be a single paragraph describing all key novel findings of the study, written in present tense, and it should not exceed 175 words. Please revise it accordingly.**

We revise the abstract according to the guidelines (written in present tense; 170 words).

**Please provide up to 5 keywords in your revised manuscript (you currently have 7).**

We keep only 5 keywords, including “compensatory evolution, trade-off, Sef1, Azf1, and *Lachancea kluyveri*”.

The author contributions statement should be removed from the manuscript file. Instead, we now use CRediT to specify the contributions of each author in the journal submission system. Please use the free text box to provide more detailed descriptions. See also guide to authors:

<https://www.embopress.org/page/journal/14693178/authorguide#authorshipguidelines>;

We remove the author contributions statement entirely.

According to our journal's policy, "data not shown" (stated on page 18 of your manuscript) is not permitted. All data referred to in the paper should be displayed in the main or Expanded View figures, or in the Appendix. Please add these data or change the text accordingly if these data are not central to the study and its conclusions.

We remove the "data not shown" related statements completely since it is not required. Please check the revised text at L494-497 in the manuscript with hidden tracked changes.

Figure callouts for Fig. EV4 and Appendix Figs. S5, S6, S10, and S18 are missing. Please make sure that all panels are called out in your revised manuscript.

The figure callouts to describe the panels of each figure are added into or further specified in each figure legend. Please note that the previous Fig EV4 is changed to Fig EV5.



**- All EV Tables should be renamed as Dataset EV# and uploaded individually using the file type Data Set. Please note that the legends should be added to the corresponding files, and callouts should be revised accordingly.**

We rename each previous Table EV# to Dataset EV# and add the legend in a new sheet into each corresponding file. The callouts can be found in either the legends or the README sheet in each excel file.

**- Please revise the title and remove line numbering from your Appendix file.**

We revise the title to “Rapid evolutionary repair by secondary perturbation of a primary disrupted transcriptional network” and also remove the line numbering from the Appendix file.

**- Your Figure legends have been inspected by our data editors for completeness and accuracy. Please see the required changes in the attached Word file and address all comments in your revised manuscript (with tracked changes).**

We modify the figure legends according to the editorial suggestions in the revised manuscript.

**- Please note that EMBO press papers are accompanied online by**

**A) a short (1-2 sentences) summary of the findings and their significance,**

**B) 2-4 bullet points highlighting the key results, and**

**C) a synopsis image that is exactly 550 pixels wide and 200-600 pixels high (the height is variable). You can either show a model or key data in the synopsis image. Please note that text needs to be readable at the final size.**

**Please send us this information along with your revised manuscript.**

We add a summary and four highlights for the synopsis in the revised manuscript before the Abstract.

Response to Reviewer 1 (Reviewer's comments in **bold** and responses in **red**):

- **Referee #1:**

**Comments to the Authors**

**In the revised version of the manuscript, the authors have addressed all my queries satisfactorily. I think that this is an interesting study, and the revised manuscript can be accepted for publication.**

**We appreciate you taking the time to review our manuscript and bring us good suggestions and comments.**

Response to Reviewer 2 (Reviewer's comments in **bold** and responses in **red**):

- **Referee #2:**

**Comments to the Authors**

The manuscript was adequately revised and my concerns for the most part addressed. There was only one point that I insist to be modified in the manuscript prior to publication.

My point on what triggers RAS-PKA mutations was either missed or my comment was not clear enough. In particular, the statement 'All such mutations, which arose repeatedly, proved beneficial, globally enhancing fitness seemly irrespective of the diverse laboratory conditions' in lines 286-287 is erroneous, can be misleading, does not add to the manuscript and thus should be omitted. A careful dissection of the conditions that favor these mutations (all citations that proceed the statement) will show that they arise as a response to nutrient limitation (either in a chemostat or at some point of the cycle in batch culture). In fact, the cited Wenger et al 2011 explicitly showed that the related evolved mutants display tradeoffs when glucose limitation is removed. The manuscript's own desiccation hypersensitivity assay also shows that *ira1* perturbations increase desiccation sensitivity. Additionally, if they indeed globally enhance fitness, then we would have to assume that the activity of the

**RAS-PKA is suboptimal in the wild parental strain, which does not really make sense. Please omit statement.**

Thanks for the clarification of the previous comments. We remove the inappropriate statement “All such mutations, which arose repeatedly, proved beneficial, globally enhancing fitness seemly irrespective of the diverse laboratory conditions”. Please check the modified paragraph at L305-315.

Response to Reviewer 3 (Reviewer's comments in **bold** and responses in **red**):

- **Referee #3:**

**Comments to the Authors**

The authors made a significant effort to improve the manuscript, and I greatly appreciate the new experiments performed, i.e. the epistasis analysis and the evolution experiments using the WT as a control. I also appreciate the honesty with which the new data are presented. However, the new data raises a serious concern about the interpretation of the original suppressor screen. Specifically, the epistasis analysis (Table EV13) clearly show that the slow-growing *sef1* knockout is not compensated by either *azf1* or *ira1* deletion under the conditions where the suppressor screen was performed (YPGly). It is true that the fitness of  $\Delta sef1$  is enhanced by *azf1* or *ira1* deletion, however, wild-type fitness is also enhanced to a similar extent by these mutations. Thus, there is no evidence for compensation / suppression, which would manifest itself as positive epistasis between  $\Delta sef1$  and  $\Delta azf1$  or  $\Delta ira1$  (i.e. that's the widely used definition of suppression / compensation, see van Leeuwen et al. Science 2016, Moore, Rozen, Lenski Proc Roy Soc B 2000). In a similar vein, the authors now report the possible emergence of  $\Delta azf1$  and  $\Delta ira1$  mutations when the wild-type background was subjected to 'suppressor' screening. Together these observations indicate that the recovered mutations are general beneficial mutations in these environments and not suppressor or compensatory

mutations. Simply, I don't see any evidence for compensatory evolution. This is more than a terminological nuance. It implies that several of the claims of the paper (including title and abstract) has to be rewritten to reflect the fact that the suppressor screen identified mutations that are general beneficial mutations and can be selected in the WT background as well. It further implies that the conceptual model presented on Fig EV4 should also be heavily revised: *ira1* or *azf1* deletions do not actually act as permissive mutations because they don't change the relative fitness impact of SEF1 loss.

Overall, I still think that the study is highly worthy of publication in EMBO Reports as it uncovers an important molecular rewiring by which fitness can be increased. However, the conceptual framework and story must be substantially changed to accommodate the totality of evidence presented by the authors.

We are sorry for not highlighting the evidence of compensatory evolution from this study. We agree with Referee #3 about the comment that "fitness" displayed as maximal growth rates, it is not typical "compensation" according to the "positive epistasis" definition. However, evidence supports that loss-of-function *azf1* mutations are compensatory in the "gene expression" under the *sef1Δ* background compared with the wild type. We show this evidence in the newly added Fig EV3 and add a clear interpretation at L421-434. Generally, the *azf1Δ* induced a higher restoration in the expression of TCA cycle genes and a more dramatic differential expression in glycerol and stress responsive pathways (shown as fold-changes of gene expression) in the presence of *sef1Δ* than in the absence (i.e., the wild type).

Then, we carefully go through the whole manuscript and modify it more conservatively.

First, we use “evolution repair” to replace “compensatory evolution”. Second, we use “adaptive” to replace “compensatory/suppressive”. Third, we clarify the effects of adaptation using more specific terms, i.e., (1) “beneficial” in fitness and (2) “compensatory” in gene expression. Finally, we use the “historical contingency” model to replace the “permissive” model in Fig EV 5 (which is Fig EV4 in the previous version of the manuscript). To be noted, we still use “suppressor” to describe our evolved clones because we think it has been a historically well-accepted genetic term used in suppressor-selecting experiments.

Generally, we believe that our conceptual framework and significance of the story are still properly maintained, that is, “the *sef1* $\Delta$  cells rapidly acquire adaptive mutations whose beneficial effects in fitness allows cells to survive under selective environment and compensatory effects in gene expression allows the *sef1* $\Delta$  transcriptional network having the chance to further evolve”.



Dear Dr. Hsu,

Thank you for submitting your revised manuscript to EMBO reports. Referee #3 has now re-evaluated your improved manuscript and recommends publication.

Before we can proceed to accept your manuscript, we need you to make sure that all Figure panels are called out in your revised manuscript. We noticed that Figure callouts for Appendix Figs. S5A-C, S6A-C, S10A&B, and S18A&B are still missing.

Please also note that as part of the EMBO publications' Transparent Editorial Process, EMBO reports publishes online a Review Process File to accompany accepted manuscripts. This File will be published in conjunction with your paper and will include the referee reports, your point-by-point response and all pertinent correspondence relating to the manuscript.

You can opt out of this by letting the editorial office know ([emboreports@embo.org](mailto:emboreports@embo.org)). If you do opt out, the Review Process File link will point to the following statement: "No Review Process File is available with this article, as the authors have chosen not to make the review process public in this case."

We would also welcome the submission of cover suggestions or motifs to be used by our Graphics Illustrator in designing a cover.

We look forward to seeing a final version of your manuscript as soon as possible.

Yours sincerely,

Ioannis Papaioannou, PhD  
Editor  
EMBO reports

-----  
Referee #3:

I appreciate the author's further efforts to clarify the manuscript. They now much more clearly distinguish between mutational effects that are compensatory versus beneficial. I agree with their interpretation and I recommend the paper for publication in its present form.

The authors have addressed all minor editorial requests.

Dr. Po-Chen Hsu  
Institute of Molecular Biology, Academia Sinica  
128 Sec.2, Academia Road  
Nankang, Taipei 115  
Taiwan

Dear Dr. Hsu,

I am very pleased to accept your manuscript for publication in the next available issue of EMBO reports. Thank you for your contribution to our journal.

At the end of this email I include important information about how to proceed. Please ensure that you take the time to read the information and complete and return the necessary forms to allow us to publish your manuscript as quickly as possible.

As part of the EMBO publication's Transparent Editorial Process, EMBO reports publishes online a Review Process File to accompany accepted manuscripts. As you are aware, this File will be published in conjunction with your paper and will include the referee reports, your point-by-point response and all pertinent correspondence relating to the manuscript.

If you do NOT want this File to be published, please inform the editorial office within 2 days, if you have not done so already, otherwise the File will be published by default [contact: emboreports@embo.org]. If you do opt out, the Review Process File link will point to the following statement: "No Review Process File is available with this article, as the authors have chosen not to make the review process public in this case."

Should you be planning a Press Release on your article, please get in contact with emboreports@wiley.com as early as possible, in order to coordinate publication and release dates.

Thank you again for your contribution to EMBO reports and congratulations on a successful publication. Please consider us again in the future for your most exciting work.

Yours sincerely,

Ioannis Papaioannou, PhD  
Editor  
EMBO reports

\*\*\*\*\*

THINGS TO DO NOW:

Please note that you will be contacted by Wiley Author Services to complete licensing and payment information. The required 'Page Charges Authorization Form' is available here: [https://www.embopress.org/pb-assets/embo-site/er\\_apc.pdf](https://www.embopress.org/pb-assets/embo-site/er_apc.pdf) - please download and complete the form and return to [embopressproduction@wiley.com](mailto:embopressproduction@wiley.com)

EMBO Press participates in many Publish and Read agreements that allow authors to publish Open Access with reduced/no publication charges. Check your eligibility: <https://authorservices.wiley.com/author-resources/Journal-Authors/open-access/affiliation-policies-payments/index.html>

You will receive proofs by e-mail approximately 2-3 weeks after all relevant files have been sent to our Production Office; you should return your corrections within 2 days of receiving the proofs.

Please inform us if there is likely to be any difficulty in reaching you at the above address at that time. Failure to meet our deadlines may result in a delay of publication, or publication without your corrections.

All further communications concerning your paper should quote reference number EMBOR-2022-56019V4 and be addressed to [emboreports@wiley.com](mailto:emboreports@wiley.com).

Should you be planning a Press Release on your article, please get in contact with [emboreports@wiley.com](mailto:emboreports@wiley.com) as early as possible, in order to coordinate publication and release dates.

## EMBO Press Author Checklist

|                                        |
|----------------------------------------|
| Corresponding Author Name: Po-Chen Hsu |
| Journal Submitted to: EMBO Reports     |
| Manuscript Number: EMBOR-2022-56019V1  |

### USEFUL LINKS FOR COMPLETING THIS FORM

- [The EMBO Journal - Author Guidelines](#)
- [EMBO Reports - Author Guidelines](#)
- [Molecular Systems Biology - Author Guidelines](#)
- [EMBO Molecular Medicine - Author Guidelines](#)

### Reporting Checklist for Life Science Articles (updated January 2022)

This checklist is adapted from Materials Design Analysis Reporting (MDAR) Checklist for Authors. MDAR establishes a minimum set of requirements in transparent reporting in the life sciences (see Statement of Task: [10.31222/osf.io/9sm4x](https://doi.org/10.31222/osf.io/9sm4x)). Please follow the journal's guidelines in preparing your manuscript.

**Please note that a copy of this checklist will be published alongside your article.**

### Abridged guidelines for figures

#### 1. Data

The data shown in figures should satisfy the following conditions:

- the data were obtained and processed according to the field's best practice and are presented to reflect the results of the experiments in an accurate and unbiased manner.
- ideally, figure panels should include only measurements that are directly comparable to each other and obtained with the same assay.
- plots include clearly labeled error bars for independent experiments and sample sizes. Unless justified, error bars should not be shown for technical replicates.
- if  $n < 5$ , the individual data points from each experiment should be plotted. Any statistical test employed should be justified.
- Source Data should be included to report the data underlying figures according to the guidelines set out in the authorship guidelines on Data Presentation.

#### 2. Captions

Each figure caption should contain the following information, for each panel where they are relevant:

- a specification of the experimental system investigated (eg cell line, species name).
- the assay(s) and method(s) used to carry out the reported observations and measurements.
- an explicit mention of the biological and chemical entity(ies) that are being measured.
- an explicit mention of the biological and chemical entity(ies) that are altered/varied/perturbed in a controlled manner.
- the exact sample size (n) for each experimental group/condition, given as a number, not a range;
- a description of the sample collection allowing the reader to understand whether the samples represent technical or biological replicates (including how many animals, litters, cultures, etc.).
- a statement of how many times the experiment shown was independently replicated in the laboratory.
- definitions of statistical methods and measures:
  - common tests, such as t-test (please specify whether paired vs. unpaired), simple  $\chi^2$  tests, Wilcoxon and Mann-Whitney tests, can be unambiguously identified by name only, but more complex techniques should be described in the methods section;
  - are tests one-sided or two-sided?
  - are there adjustments for multiple comparisons?
  - exact statistical test results, e.g., P values = x but not P values < x;
  - definition of 'center values' as median or average;
  - definition of error bars as s.d. or s.e.m.

**Please complete ALL of the questions below.**  
Select "Not Applicable" only when the requested information is not relevant for your study.

### Materials

| Material Category                                                                                                                                                                                             | Information included in the manuscript? | In which section is the information available?<br><small>(Reagents and Tools Table, Materials and Methods, Figures, Data Availability Section)</small> |
|---------------------------------------------------------------------------------------------------------------------------------------------------------------------------------------------------------------|-----------------------------------------|--------------------------------------------------------------------------------------------------------------------------------------------------------|
| <b>Newly Created Materials</b>                                                                                                                                                                                |                                         |                                                                                                                                                        |
| New materials and reagents need to be available; do any restrictions apply?                                                                                                                                   | Not Applicable                          |                                                                                                                                                        |
| <b>Antibodies</b>                                                                                                                                                                                             |                                         |                                                                                                                                                        |
| For antibodies provide the following information:<br>- Commercial antibodies: RRID (if possible) or supplier name, catalogue number and/or clone number<br>- Non-commercial: RRID or citation                 | Yes                                     | Materials and Methods                                                                                                                                  |
| <b>DNA and RNA sequences</b>                                                                                                                                                                                  |                                         |                                                                                                                                                        |
| Short novel DNA or RNA including primers, probes: provide the sequences.                                                                                                                                      | Yes                                     | Table EV                                                                                                                                               |
| <b>Cell materials</b>                                                                                                                                                                                         |                                         |                                                                                                                                                        |
| <b>Cell lines:</b> Provide species information, strain. Provide accession number in repository OR supplier name, catalog number, clone number, and/OR RRID.                                                   | Not Applicable                          |                                                                                                                                                        |
| <b>Primary cultures:</b> Provide species, strain, sex of origin, genetic modification status.                                                                                                                 | Not Applicable                          |                                                                                                                                                        |
| Report if the cell lines were recently <b>authenticated</b> (e.g., by STR profiling) and tested for mycoplasma contamination.                                                                                 | Not Applicable                          |                                                                                                                                                        |
| <b>Experimental animals</b>                                                                                                                                                                                   |                                         |                                                                                                                                                        |
| <b>Laboratory animals or Model organisms:</b> Provide species, strain, sex, age, genetic modification status. Provide accession number in repository OR supplier name, catalog number, clone number, OR RRID. | Not Applicable                          |                                                                                                                                                        |
| <b>Animal observed in or captured from the field:</b> Provide species, sex, and age where possible.                                                                                                           | Not Applicable                          |                                                                                                                                                        |
| Please detail housing and husbandry conditions.                                                                                                                                                               | Not Applicable                          |                                                                                                                                                        |
| <b>Plants and microbes</b>                                                                                                                                                                                    |                                         |                                                                                                                                                        |
| <b>Plants:</b> provide species and strain, ecotype and cultivar where relevant, unique accession number if available, and source (including location for collected wild specimens).                           | Not Applicable                          |                                                                                                                                                        |
| <b>Microbes:</b> provide species and strain, unique accession number if available, and source.                                                                                                                | Yes                                     | Table EV                                                                                                                                               |
| <b>Human research participants</b>                                                                                                                                                                            |                                         |                                                                                                                                                        |
| If collected and within the bounds of privacy constraints report on age, sex and gender or ethnicity for all study participants.                                                                              | Not Applicable                          |                                                                                                                                                        |
| <b>Core facilities</b>                                                                                                                                                                                        |                                         |                                                                                                                                                        |
| If your work benefited from core facilities, was their service mentioned in the acknowledgments section?                                                                                                      | Yes                                     | Acknowledgements                                                                                                                                       |

### Design

| <b>Study protocol</b>                                                                                                                                                                                                                                                                                                                      | <b>Information included in the manuscript?</b> | <b>In which section is the information available?</b><br>(Reagents and Tools Table, Materials and Methods, Figures, Data Availability Section) |
|--------------------------------------------------------------------------------------------------------------------------------------------------------------------------------------------------------------------------------------------------------------------------------------------------------------------------------------------|------------------------------------------------|------------------------------------------------------------------------------------------------------------------------------------------------|
| If study protocol has been <b>pre-registered</b> , provide DOI in the manuscript. For clinical trials, provide the trial registration number OR cite DOI.                                                                                                                                                                                  | Not Applicable                                 |                                                                                                                                                |
| Report the <b>clinical trial registration number</b> (at ClinicalTrials.gov or equivalent), where applicable.                                                                                                                                                                                                                              | Not Applicable                                 |                                                                                                                                                |
| <b>Laboratory protocol</b>                                                                                                                                                                                                                                                                                                                 | <b>Information included in the manuscript?</b> | <b>In which section is the information available?</b><br>(Reagents and Tools Table, Materials and Methods, Figures, Data Availability Section) |
| Provide DOI OR other citation details if <b>external detailed step-by-step protocols</b> are available.                                                                                                                                                                                                                                    | Not Applicable                                 |                                                                                                                                                |
| <b>Experimental study design and statistics</b>                                                                                                                                                                                                                                                                                            | <b>Information included in the manuscript?</b> | <b>In which section is the information available?</b><br>(Reagents and Tools Table, Materials and Methods, Figures, Data Availability Section) |
| Include a statement about <b>sample size</b> estimate even if no statistical methods were used.                                                                                                                                                                                                                                            | Yes                                            | Legends of Figures and Figure EV                                                                                                               |
| Were any steps taken to minimize the effects of subjective bias when allocating animals/samples to treatment (e.g. <b>randomization procedure</b> )? If yes, have they been described?                                                                                                                                                     | Not Applicable                                 |                                                                                                                                                |
| Include a statement about <b>blinding</b> even if no blinding was done.                                                                                                                                                                                                                                                                    | Not Applicable                                 |                                                                                                                                                |
| Describe <b>inclusion/exclusion criteria</b> if samples or animals were excluded from the analysis. Were the criteria pre-established?                                                                                                                                                                                                     | Not Applicable                                 |                                                                                                                                                |
| If sample or data points were omitted from analysis, report if this was due to <b>attrition or intentional exclusion</b> and provide justification.                                                                                                                                                                                        |                                                |                                                                                                                                                |
| For every figure, are <b>statistical tests</b> justified as appropriate? Do the data meet the assumptions of the tests (e.g., normal distribution)? Describe any methods used to assess it. Is there an estimate of variation within each group of data? Is the variance similar between the groups that are being statistically compared? | Yes                                            | Legends of Figures and Figure EV, Materials and Methods                                                                                        |
| <b>Sample definition and in-laboratory replication</b>                                                                                                                                                                                                                                                                                     | <b>Information included in the manuscript?</b> | <b>In which section is the information available?</b><br>(Reagents and Tools Table, Materials and Methods, Figures, Data Availability Section) |
| In the figure legends: state number of times the experiment was <b>replicated</b> in laboratory.                                                                                                                                                                                                                                           | Not Applicable                                 |                                                                                                                                                |
| In the figure legends: define whether data describe <b>technical or biological replicates</b> .                                                                                                                                                                                                                                            | Yes                                            | Legends of Figures and Figure EV                                                                                                               |

#### Ethics

| <b>Ethics</b>                                                                                                                                                                                                                                                                                            | <b>Information included in the manuscript?</b> | <b>In which section is the information available?</b><br>(Reagents and Tools Table, Materials and Methods, Figures, Data Availability Section) |
|----------------------------------------------------------------------------------------------------------------------------------------------------------------------------------------------------------------------------------------------------------------------------------------------------------|------------------------------------------------|------------------------------------------------------------------------------------------------------------------------------------------------|
| Studies involving <b>human participants</b> : State details of <b>authority granting ethics approval</b> (IRB or equivalent committee(s), provide reference number for approval).                                                                                                                        | Not Applicable                                 |                                                                                                                                                |
| Studies involving <b>human participants</b> : Include a statement confirming that <b>informed consent</b> was obtained from all subjects and that the experiments conformed to the principles set out in the WMA Declaration of Helsinki and the Department of Health and Human Services Belmont Report. | Not Applicable                                 |                                                                                                                                                |
| Studies involving <b>human participants</b> : For publication of <b>patient photos</b> , include a statement confirming that consent to publish was obtained.                                                                                                                                            | Not Applicable                                 |                                                                                                                                                |
| Studies involving experimental <b>animals</b> : State details of <b>authority granting ethics approval</b> (IRB or equivalent committee(s), provide reference number for approval. Include a statement of compliance with ethical regulations).                                                          | Not Applicable                                 |                                                                                                                                                |
| Studies involving <b>specimen and field samples</b> : State if relevant <b>permits</b> obtained, provide details of authority approving study; if none were required, explain why.                                                                                                                       | Not Applicable                                 |                                                                                                                                                |
| <b>Dual Use Research of Concern (DURC)</b>                                                                                                                                                                                                                                                               | <b>Information included in the manuscript?</b> | <b>In which section is the information available?</b><br>(Reagents and Tools Table, Materials and Methods, Figures, Data Availability Section) |
| Could your study fall under dual use research restrictions? Please check biosecurity documents and list of <b>select agents and toxins</b> (CDC): <a href="https://www.selectagents.gov/sat/list.htm">https://www.selectagents.gov/sat/list.htm</a> .                                                    | Not Applicable                                 |                                                                                                                                                |
| If you used a select agent, is the security level of the lab appropriate and reported in the manuscript?                                                                                                                                                                                                 | Not Applicable                                 |                                                                                                                                                |
| If a study is subject to dual use research of concern regulations, is the name of the <b>authority granting approval</b> and <b>reference number</b> for the regulatory approval provided in the manuscript?                                                                                             | Not Applicable                                 |                                                                                                                                                |

#### Reporting

The MDAR framework recommends adoption of discipline-specific guidelines, established and endorsed through community initiatives. Journals have their own policy about requiring specific guidelines and recommendations to complement MDAR.

| <b>Adherence to community standards</b>                                                                                                                                                                                                                                                                                              | <b>Information included in the manuscript?</b> | <b>In which section is the information available?</b><br>(Reagents and Tools Table, Materials and Methods, Figures, Data Availability Section) |
|--------------------------------------------------------------------------------------------------------------------------------------------------------------------------------------------------------------------------------------------------------------------------------------------------------------------------------------|------------------------------------------------|------------------------------------------------------------------------------------------------------------------------------------------------|
| State if relevant guidelines or checklists (e.g., ICMJE, MIBBI, ARRIVE, PRISMA) have been followed or provided.                                                                                                                                                                                                                      | Not Applicable                                 |                                                                                                                                                |
| For <b>tumor marker prognostic studies</b> , we recommend that you follow the <b>REMARK</b> reporting guidelines (see link list at top right). See author guidelines, under 'Reporting Guidelines'. Please confirm you have followed these guidelines.                                                                               | Not Applicable                                 |                                                                                                                                                |
| For <b>phase II and III randomized controlled trials</b> , please refer to the <b>CONSORT</b> flow diagram (see link list at top right) and submit the <b>CONSORT</b> checklist (see link list at top right) with your submission. See author guidelines, under 'Reporting Guidelines'. Please confirm you have submitted this list. | Not Applicable                                 |                                                                                                                                                |

#### Data Availability

| <b>Data availability</b>                                                                                                                                                                          | <b>Information included in the manuscript?</b> | <b>In which section is the information available?</b><br>(Reagents and Tools Table, Materials and Methods, Figures, Data Availability Section) |
|---------------------------------------------------------------------------------------------------------------------------------------------------------------------------------------------------|------------------------------------------------|------------------------------------------------------------------------------------------------------------------------------------------------|
| Have <b>primary datasets</b> been deposited according to the journal's guidelines (see 'Data Deposition' section) and the respective accession numbers provided in the Data Availability Section? | Yes                                            | Data Availability                                                                                                                              |
| Were <b>human clinical and genomic datasets</b> deposited in a public access-controlled repository in accordance to ethical obligations to the patients and to the applicable consent agreement?  | Not Applicable                                 |                                                                                                                                                |
| Are <b>computational models</b> that are central and integral to a study available without restrictions in a machine-readable form? Were the relevant accession numbers or links provided?        | Not Applicable                                 |                                                                                                                                                |
| If publicly available data were reused, provide the respective <b>data citations</b> in the reference list.                                                                                       | Yes                                            | Materials and Methods                                                                                                                          |
